# Supplementary material
Source: PubMed Central journal article supplement (PMC5570594)

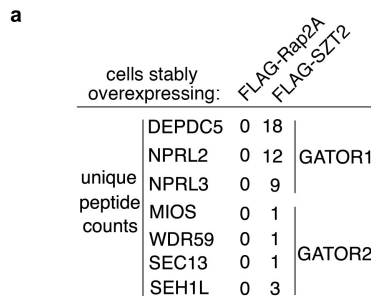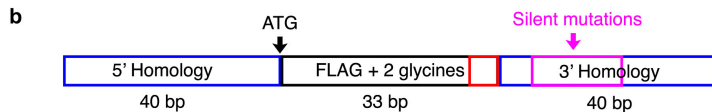

**c**

ACACCCTCACTGGCCCGGGCCGGCGGGAGGGCTGTG  
 TGATGGACTACAAGGATGACGATGACAAGGGTGGTATGGC  
 CTCcGAaCgGCCcGAaCCcGAaGTGAGGGGGCGGGC

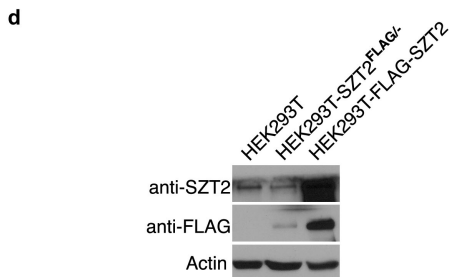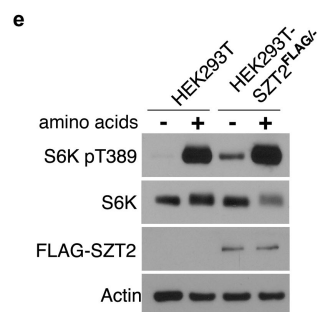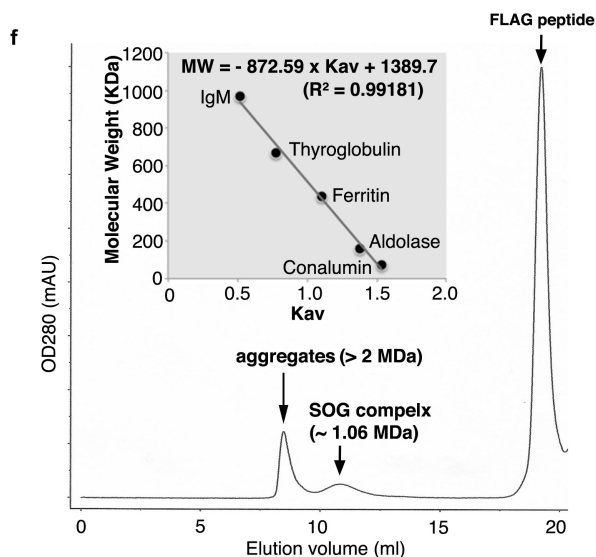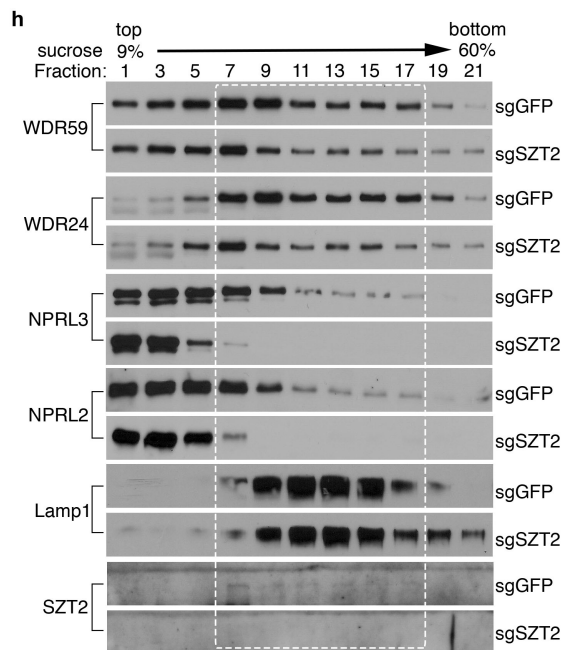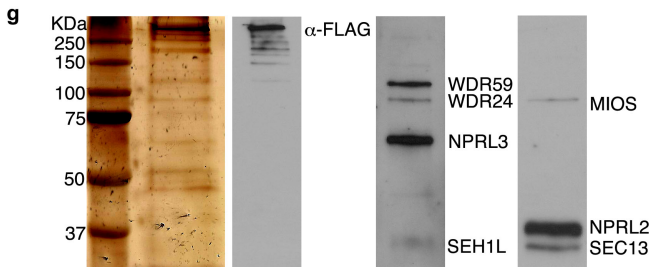

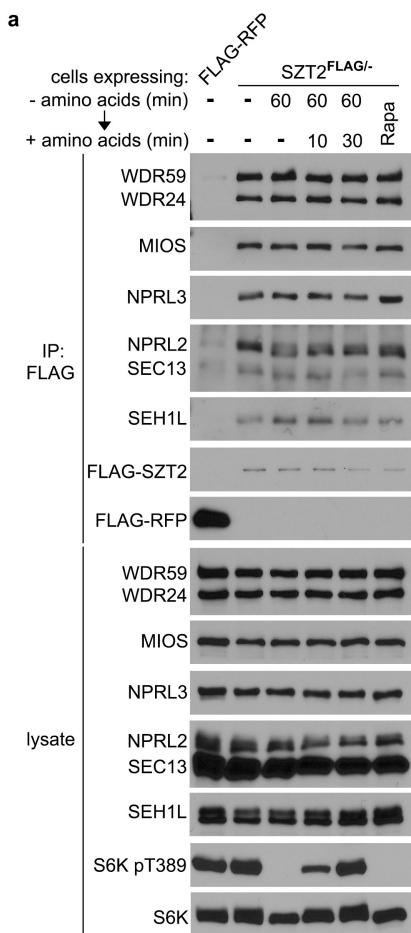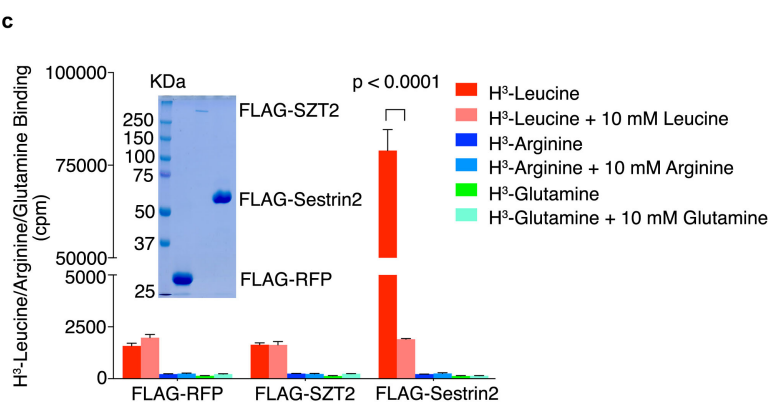

- d**
1. FLAG-RFP
  2. FLAG-Sestrin2 (purified from 293T cells)
  3. FLAG-Sestrin2 (purified from SZT2-null 293T cells)

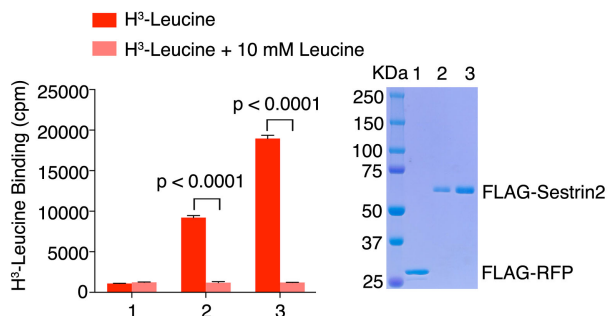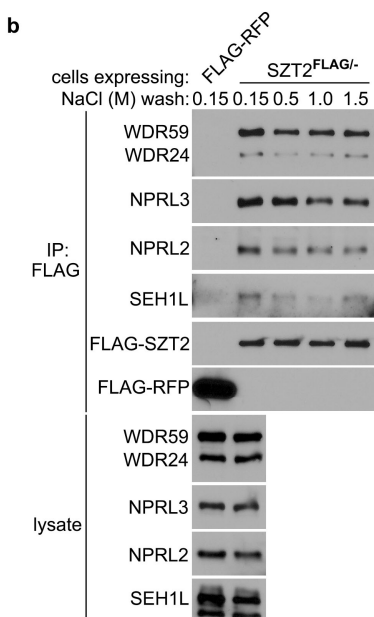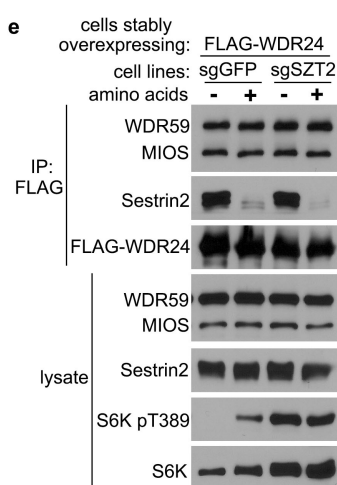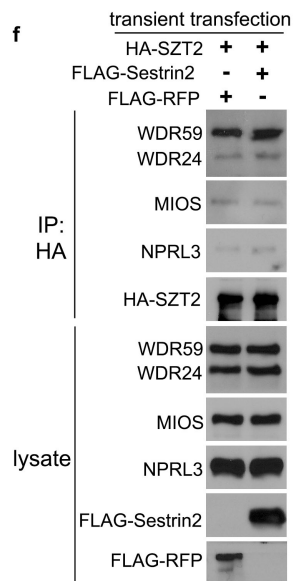

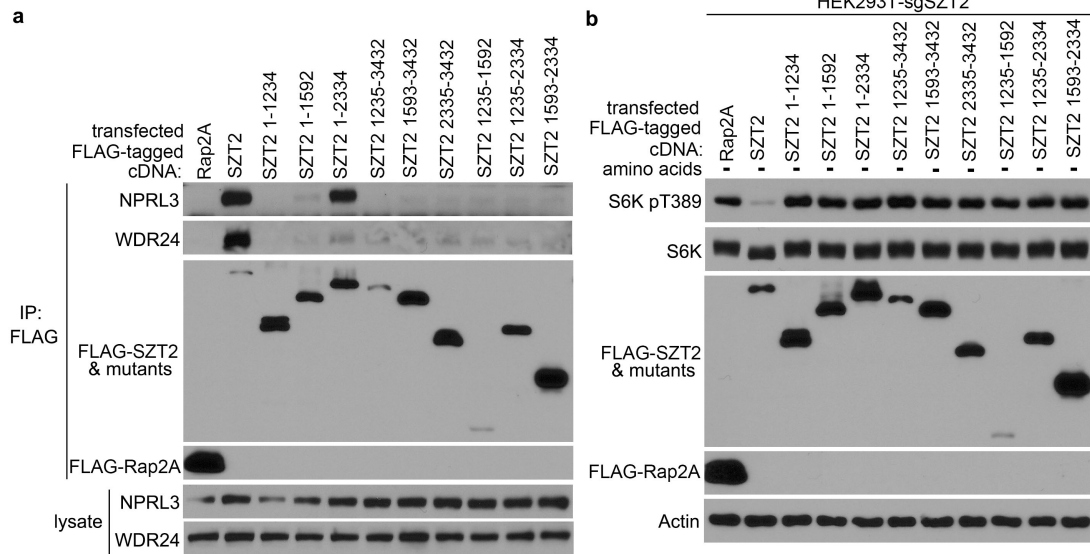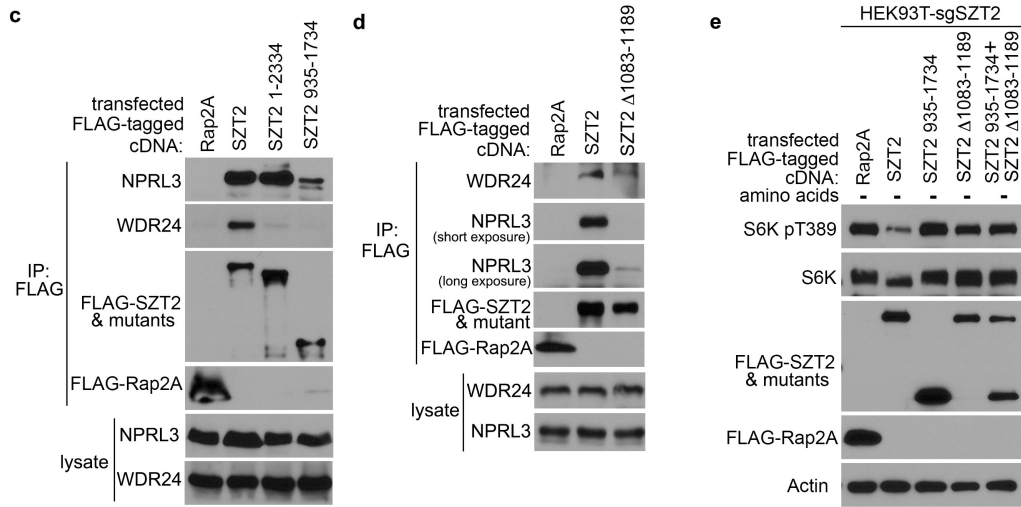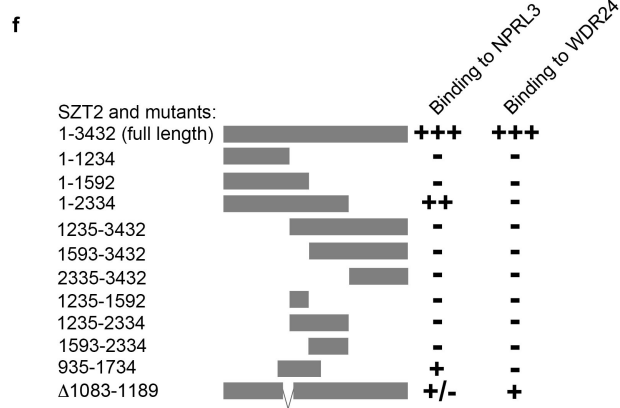



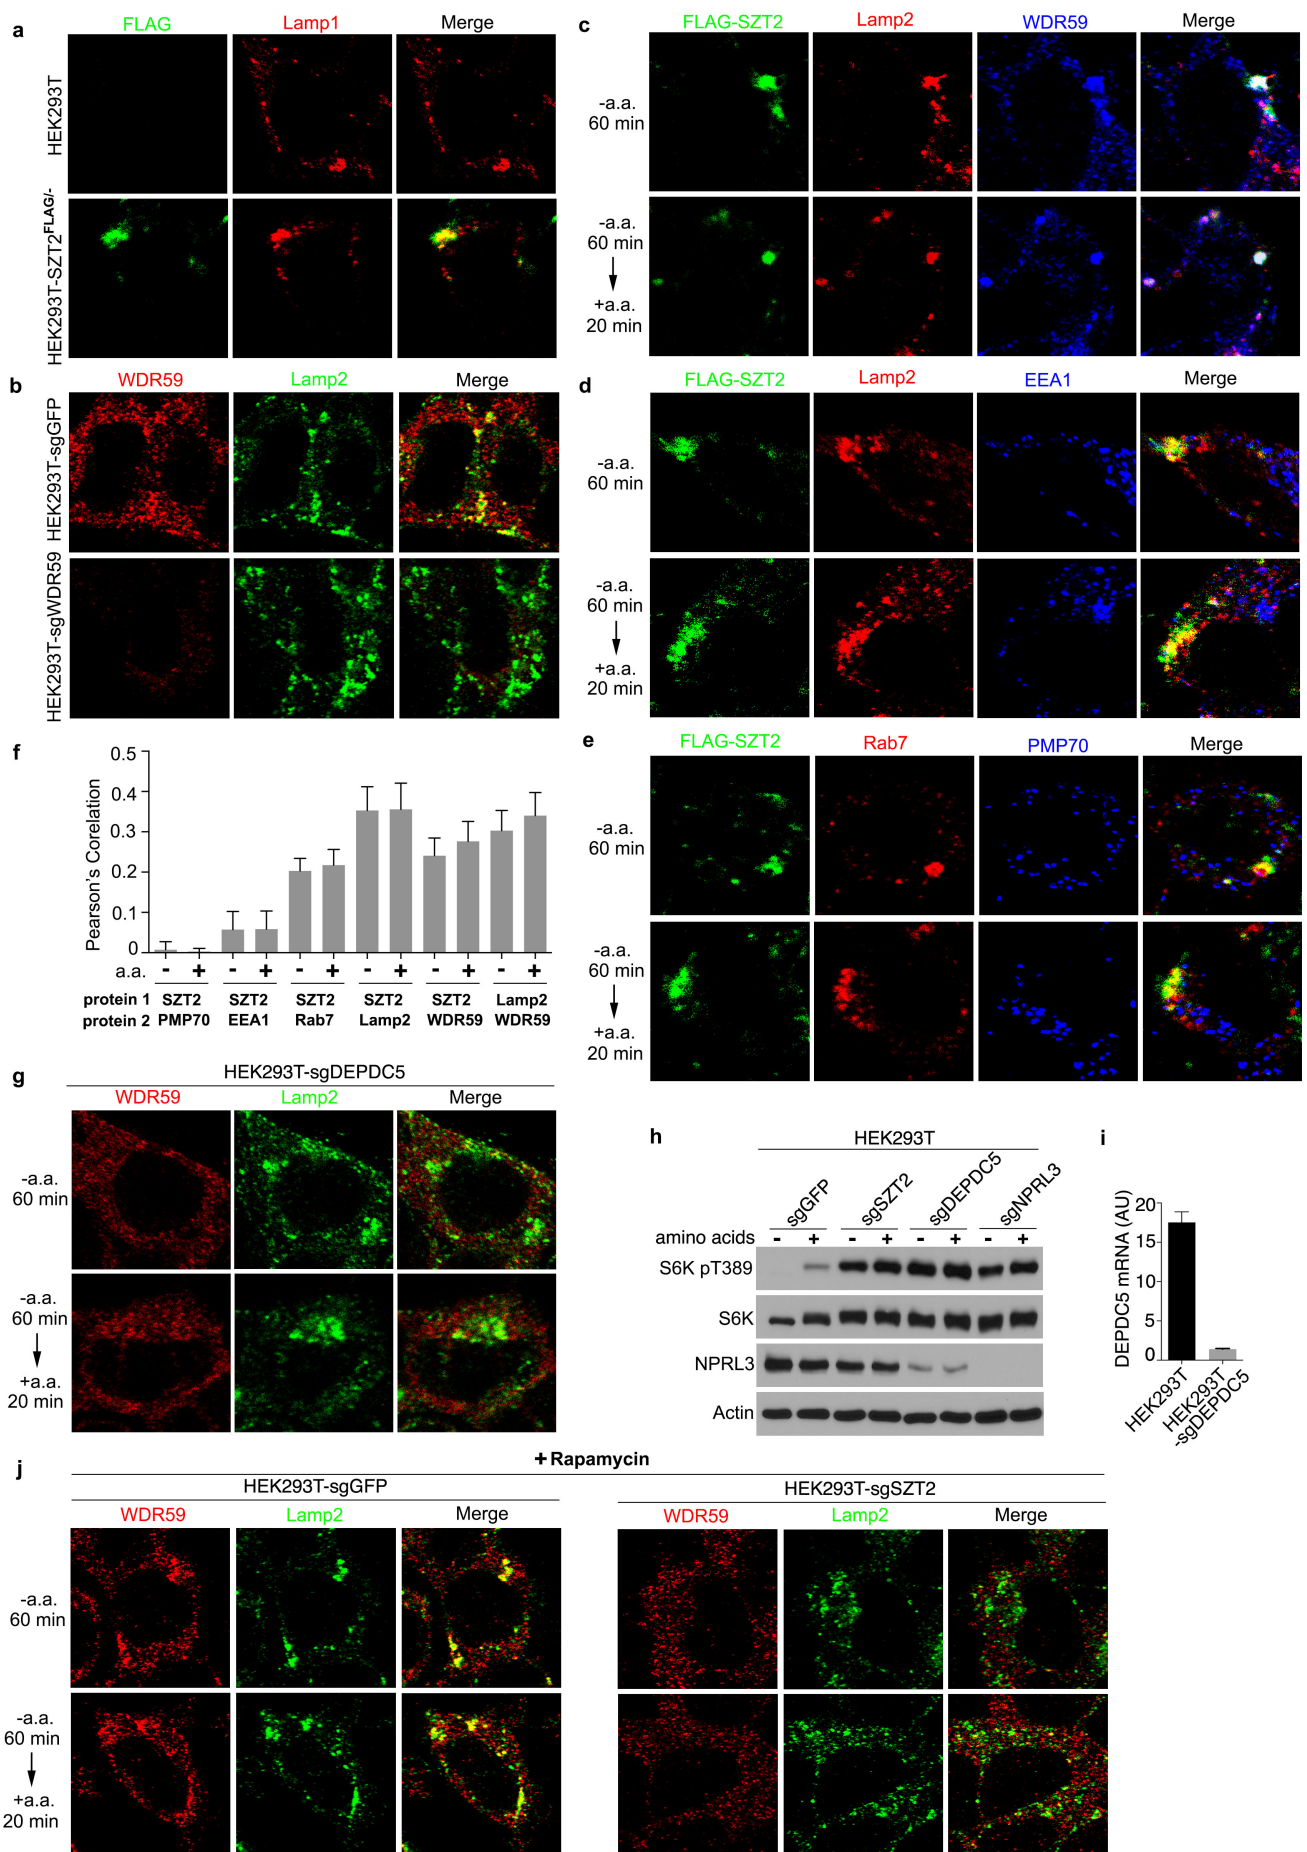

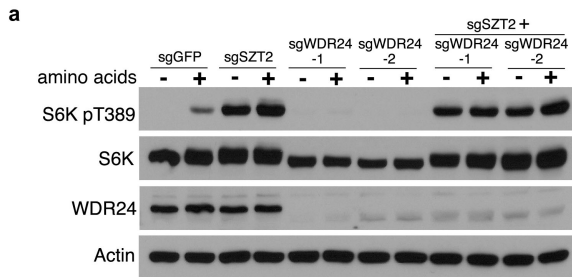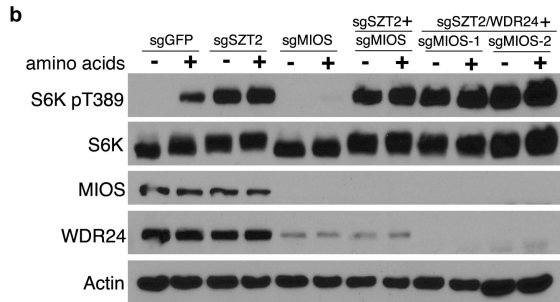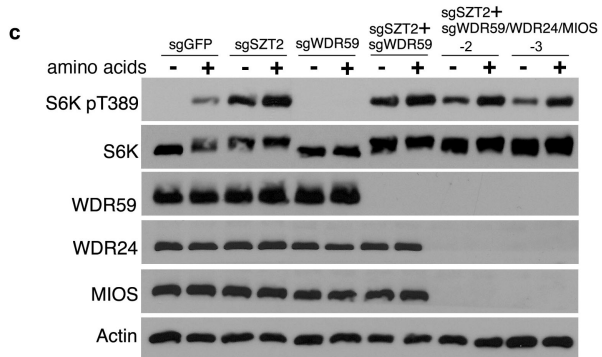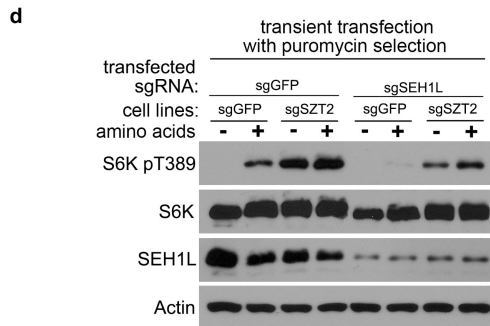



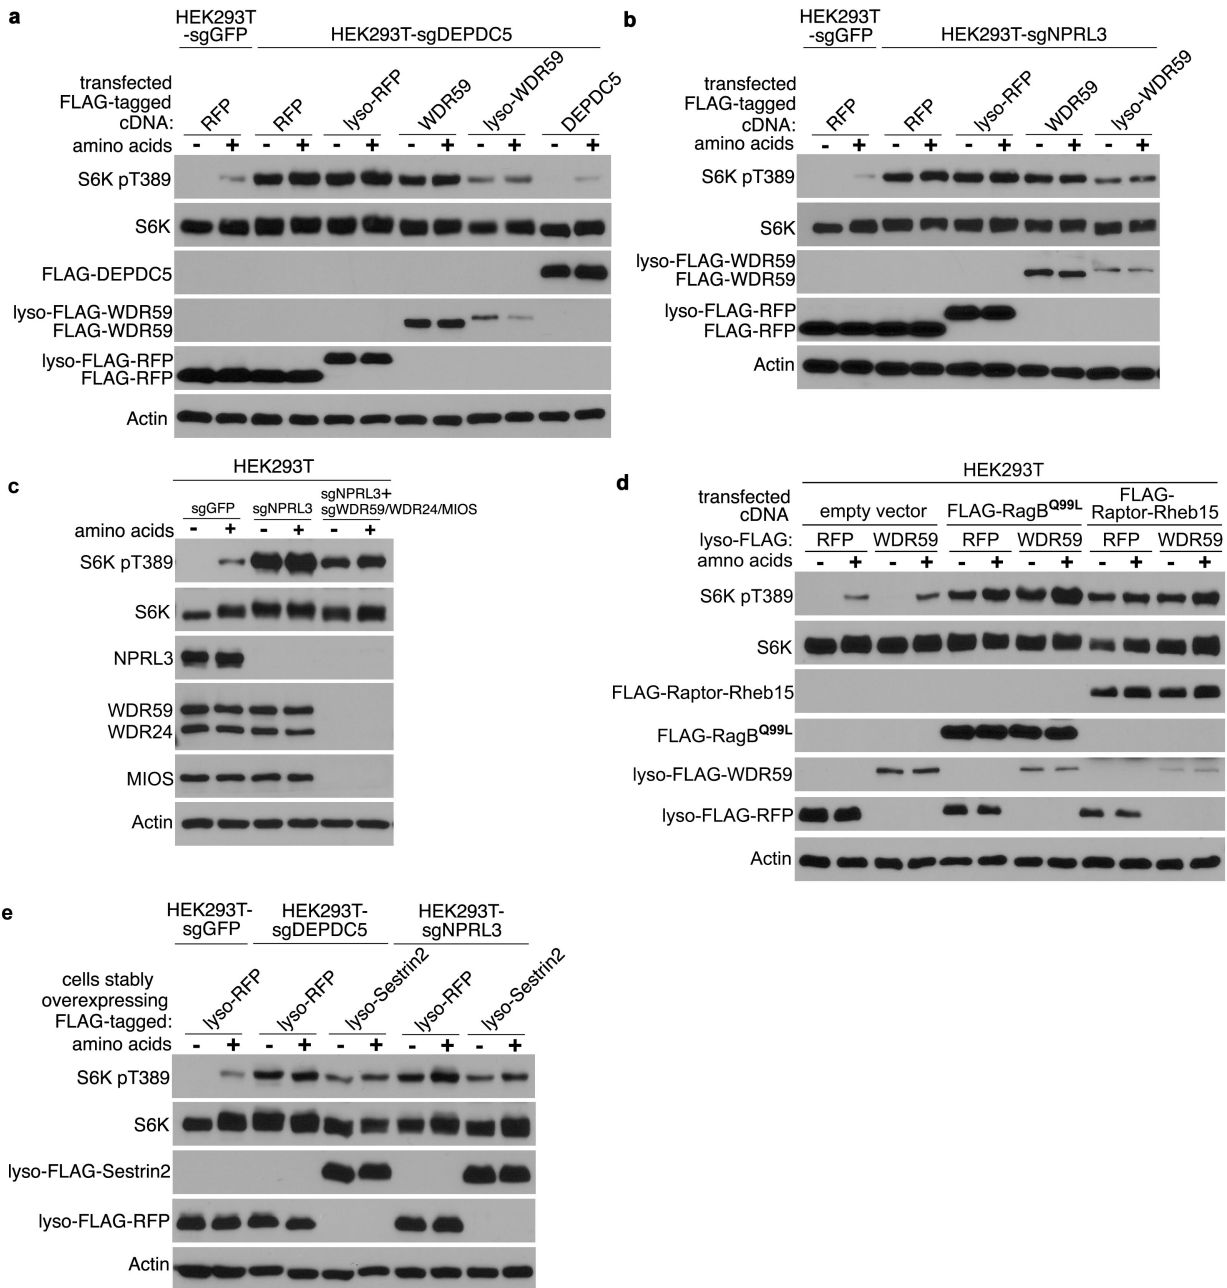

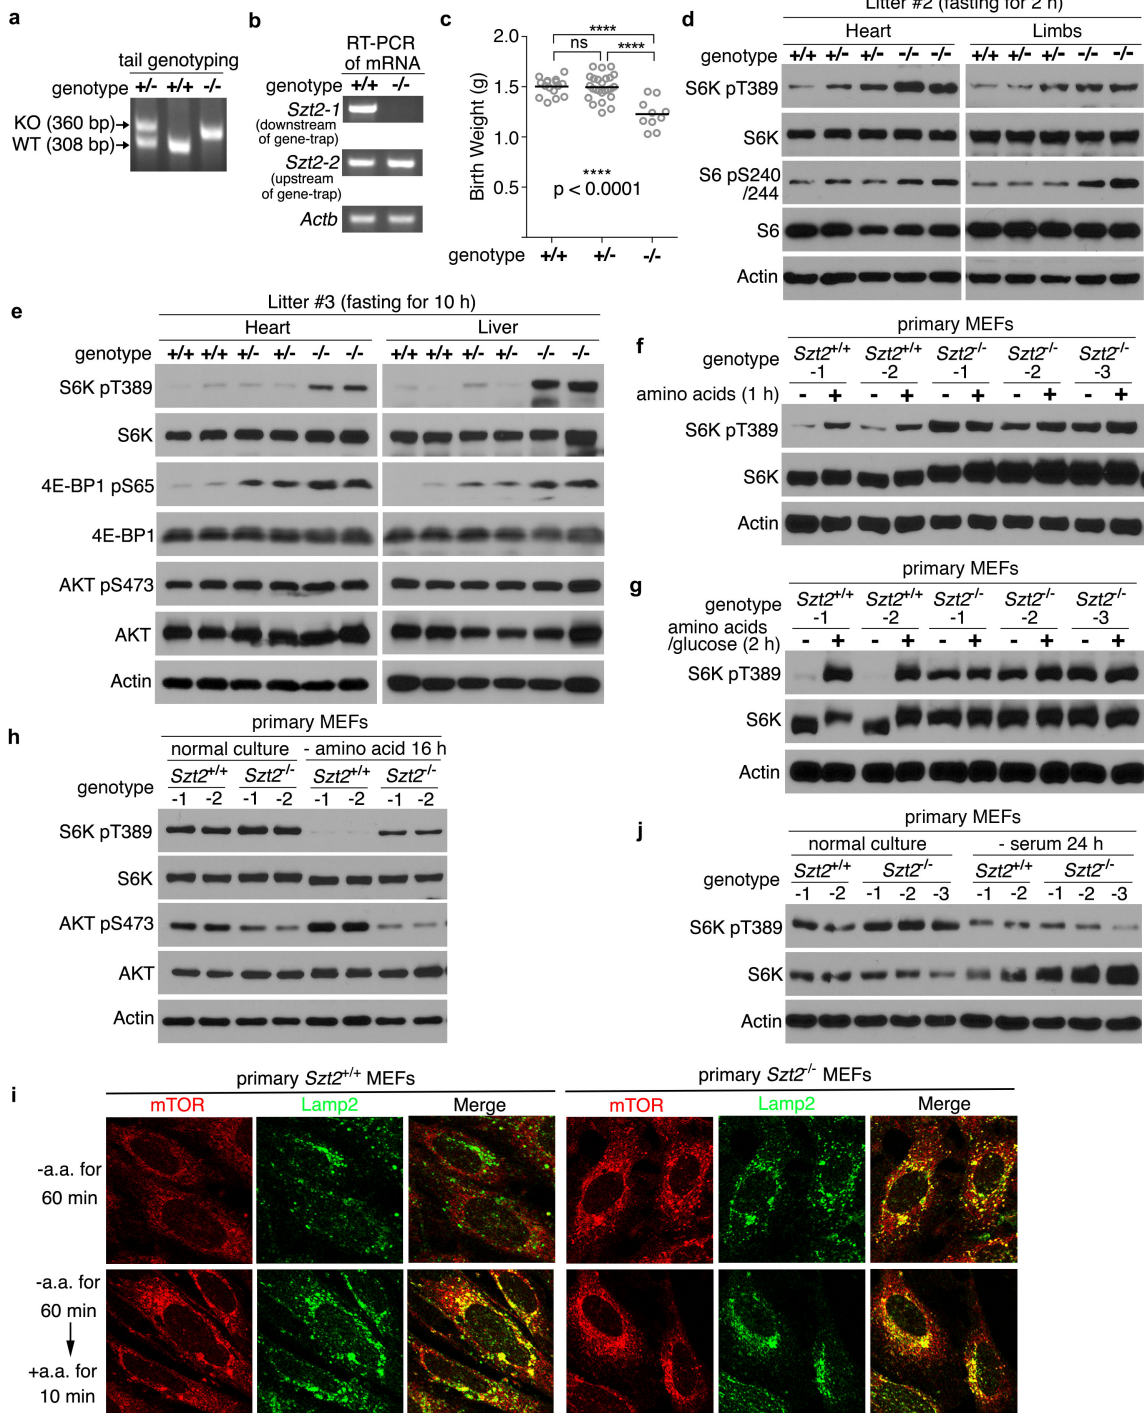

SZT2-proficient cells

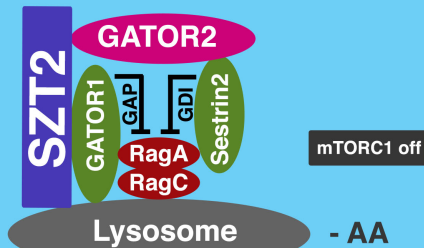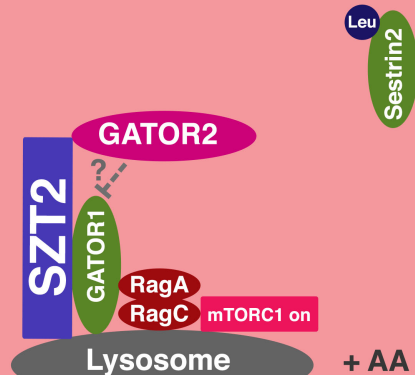

SZT2-deficient cells

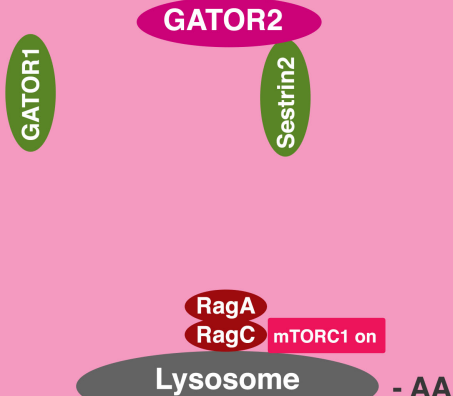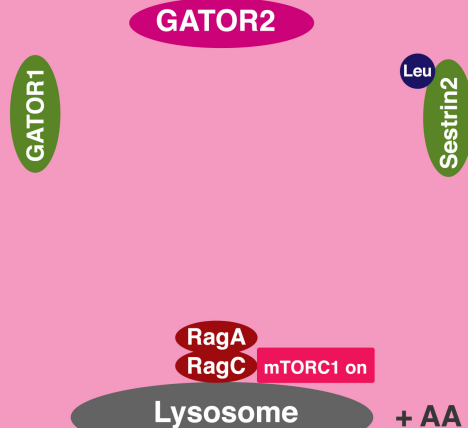

Supplement: NIHMS884602-supplement-supplemental_figure.pdf [file NIHMS884602-supplement-supplemental_figure.pdf]
