# Supplementary material
Source: PubMed Central journal article supplement (PMC5570594)
Supplement: NIHMS884602-supplement-Supplemental_1.pdf [file NIHMS884602-supplement-Supplemental_1.pdf]

**Figure 1**

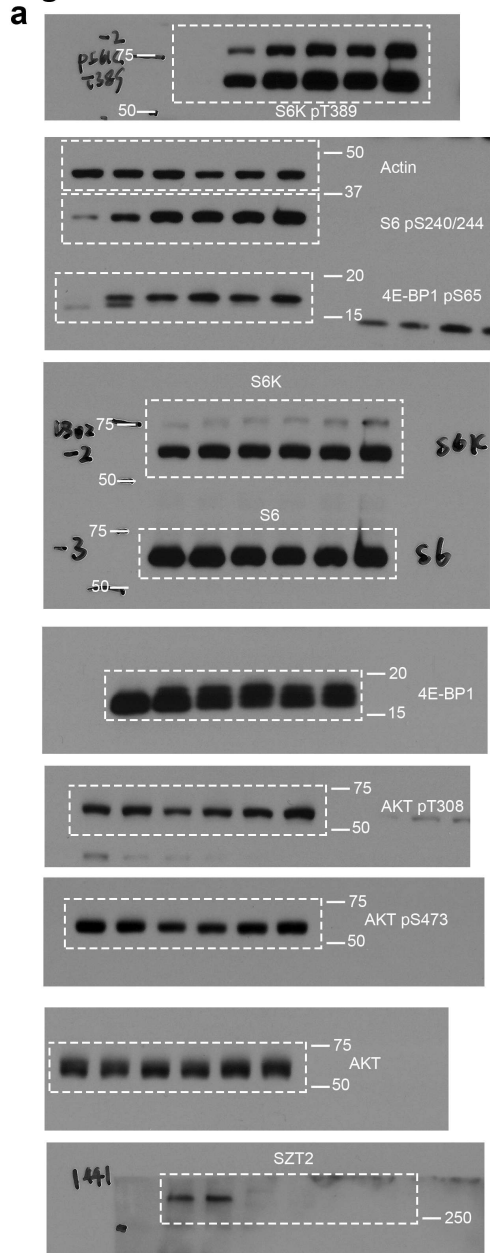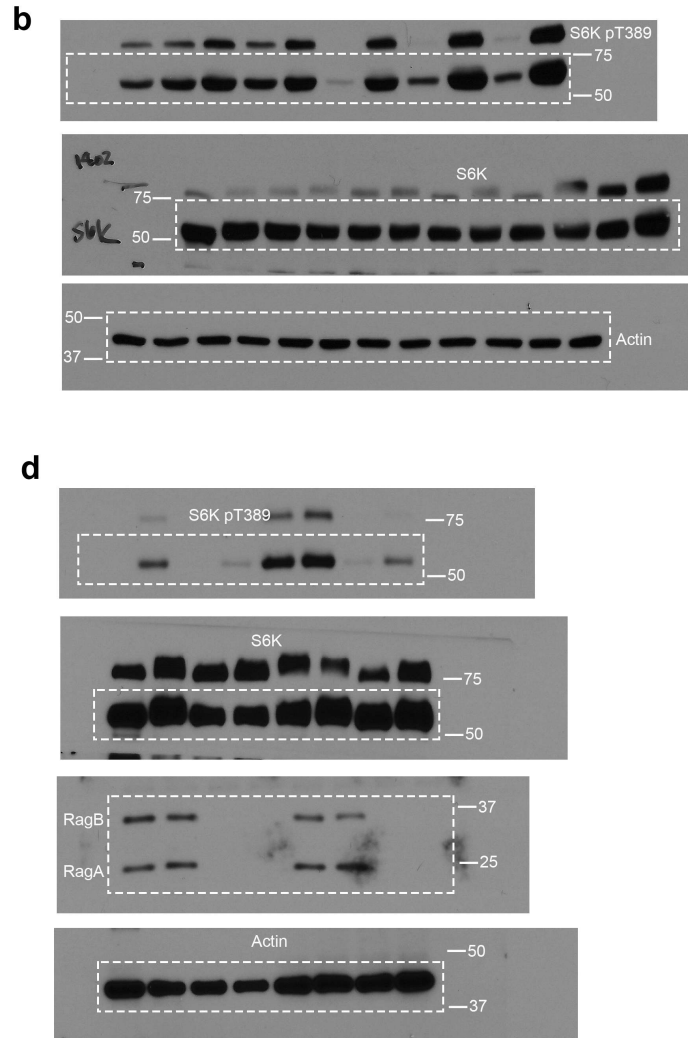

**Blots were cut into slices before incubation with primary antibodies.**

**Figure 2, a - c**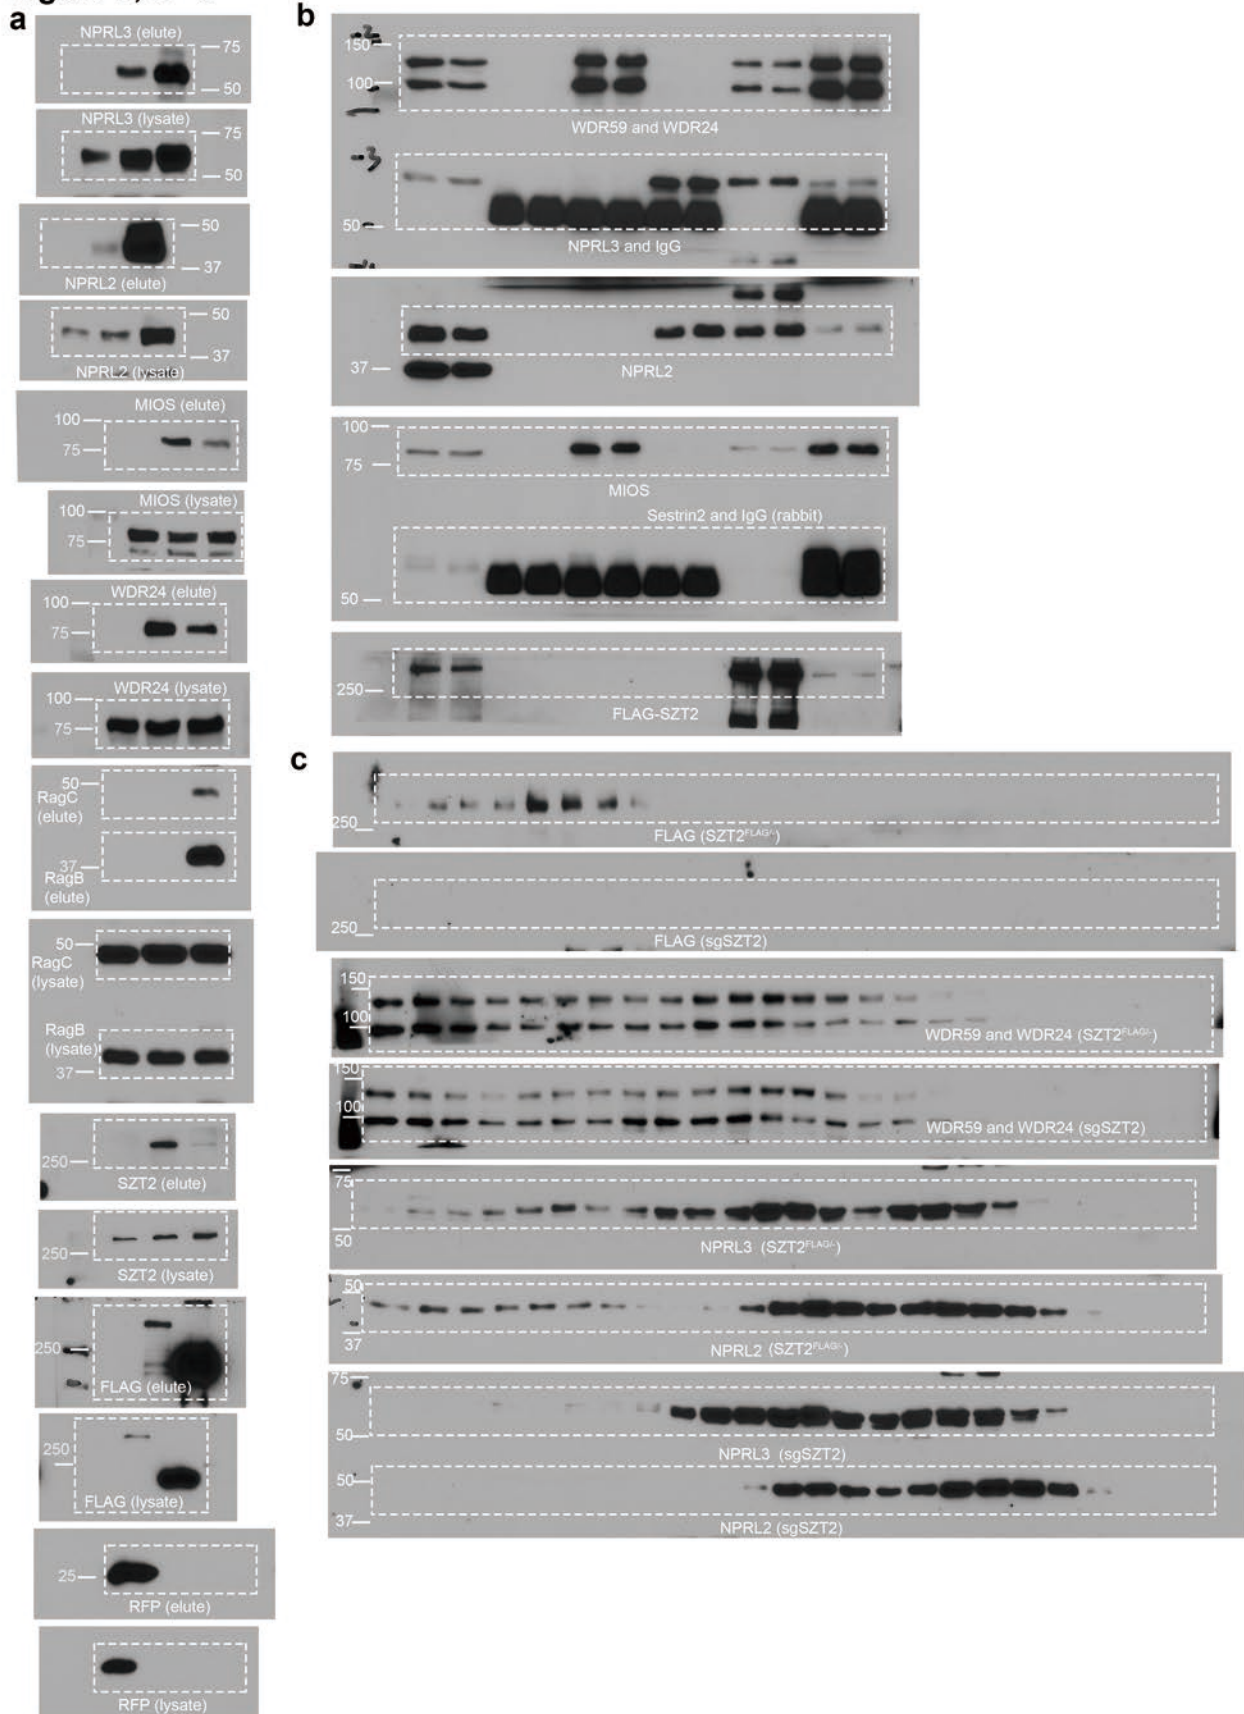

**Blots were cut into slices before incubation with primary antibodies.**

**Figure 2, d - f**

**d**

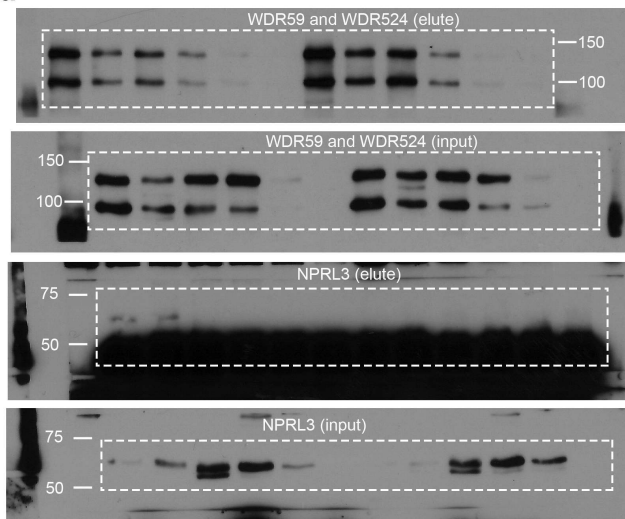

**e**

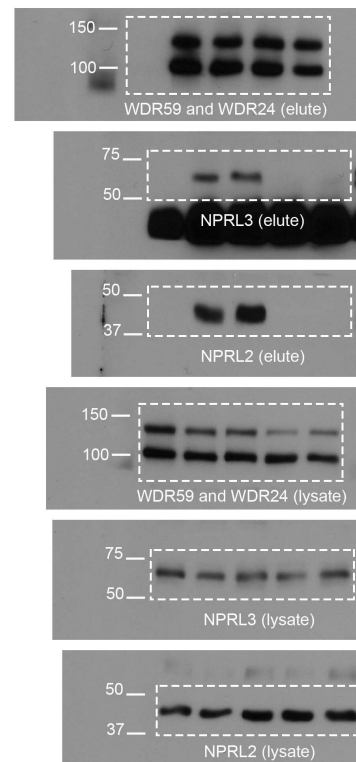

**f**

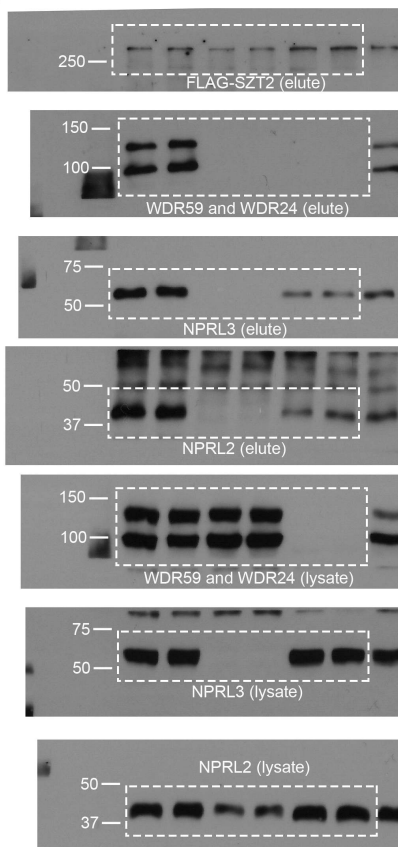

**Blots were cut into slices before incubation with primary antibodies.**

**Figure 4**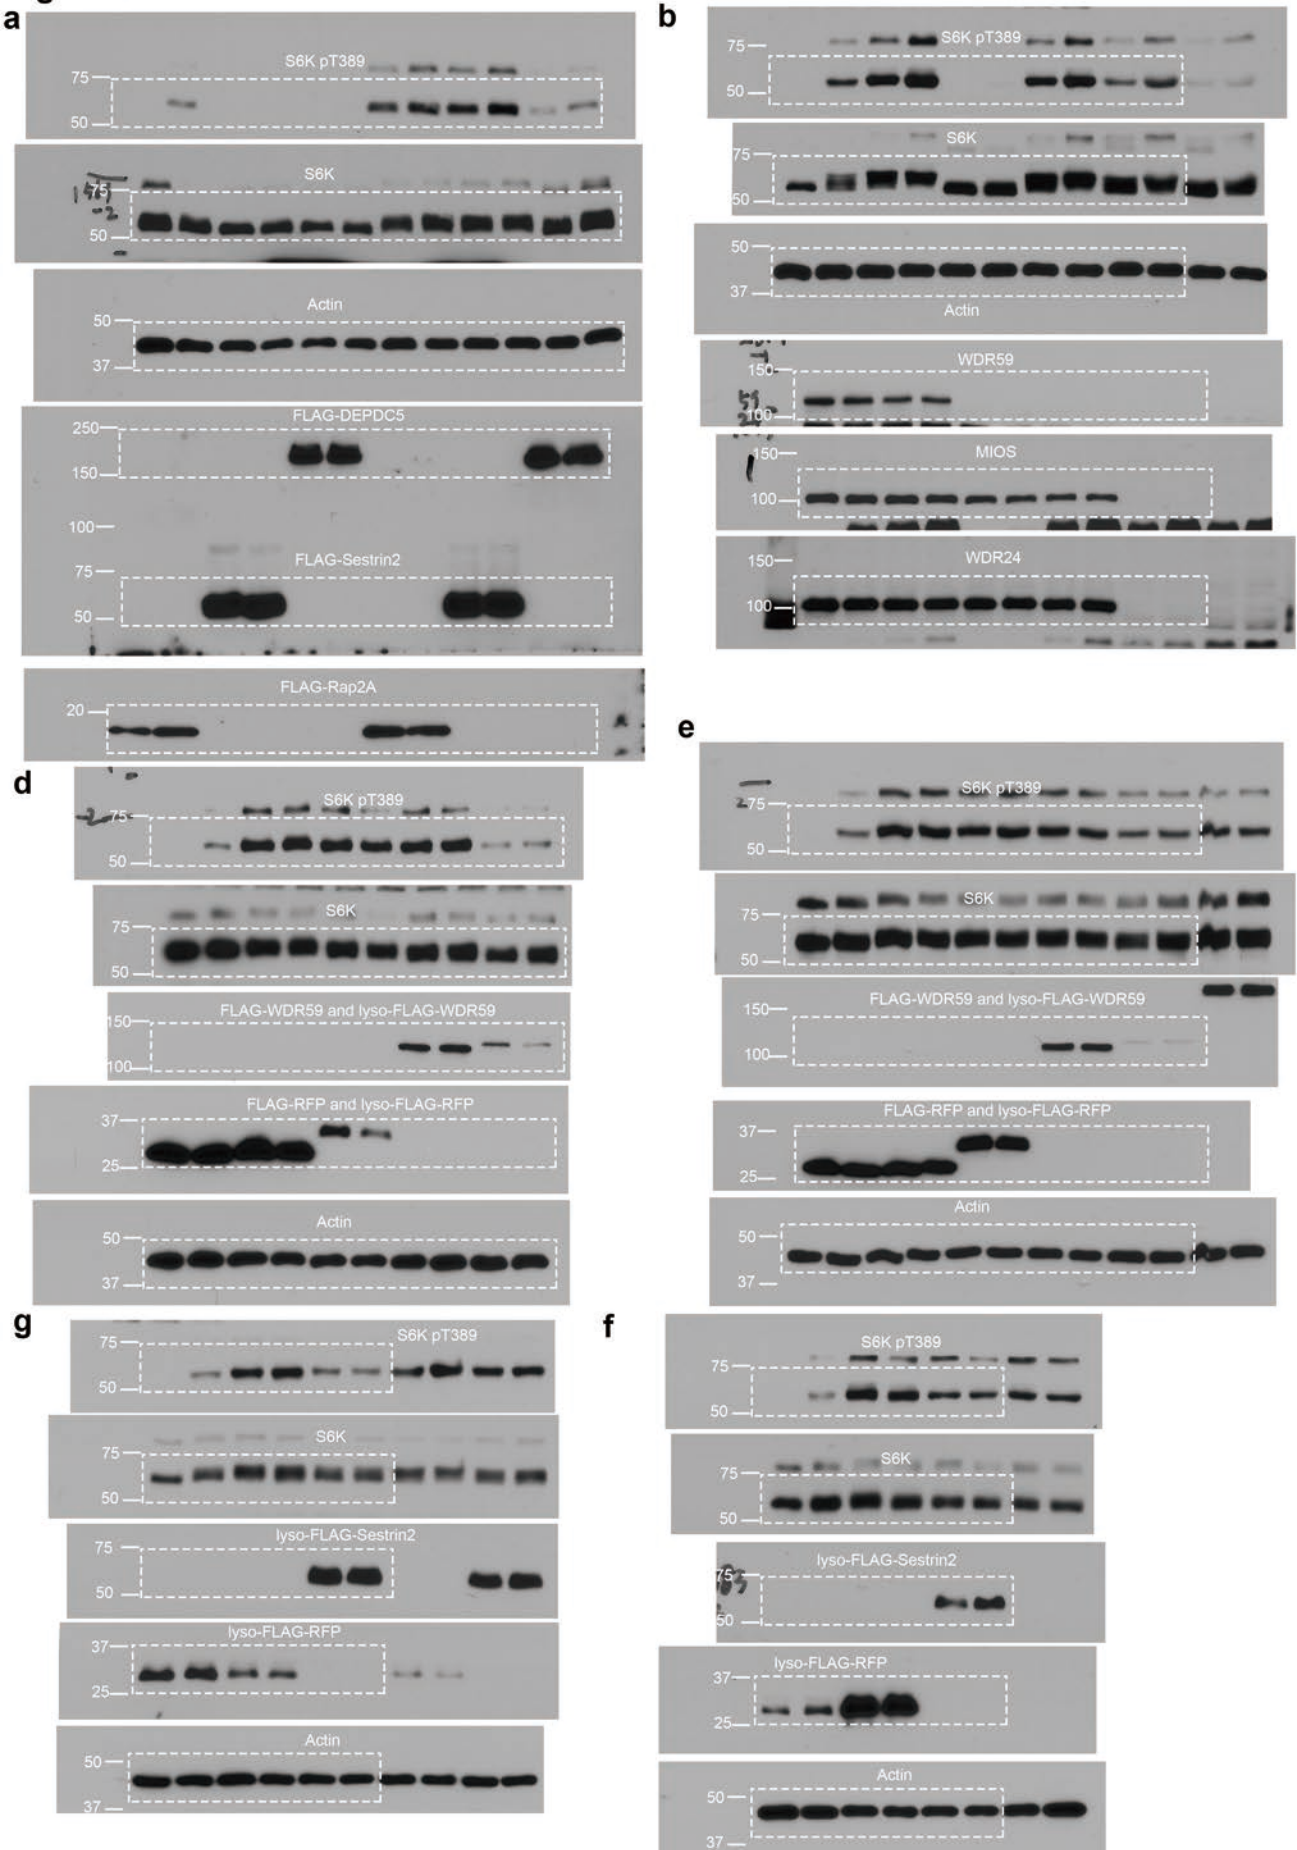

Blots were cut into slices before incubation with primary antibodies.



**Figure 5**

**e**

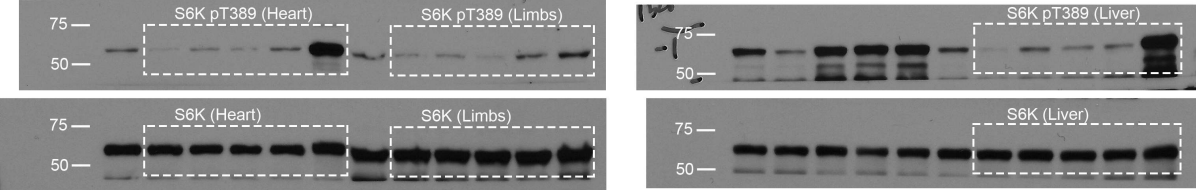

**Blots were cut into slices before incubation with primary antibodies.**

# Extended Data Figure 1

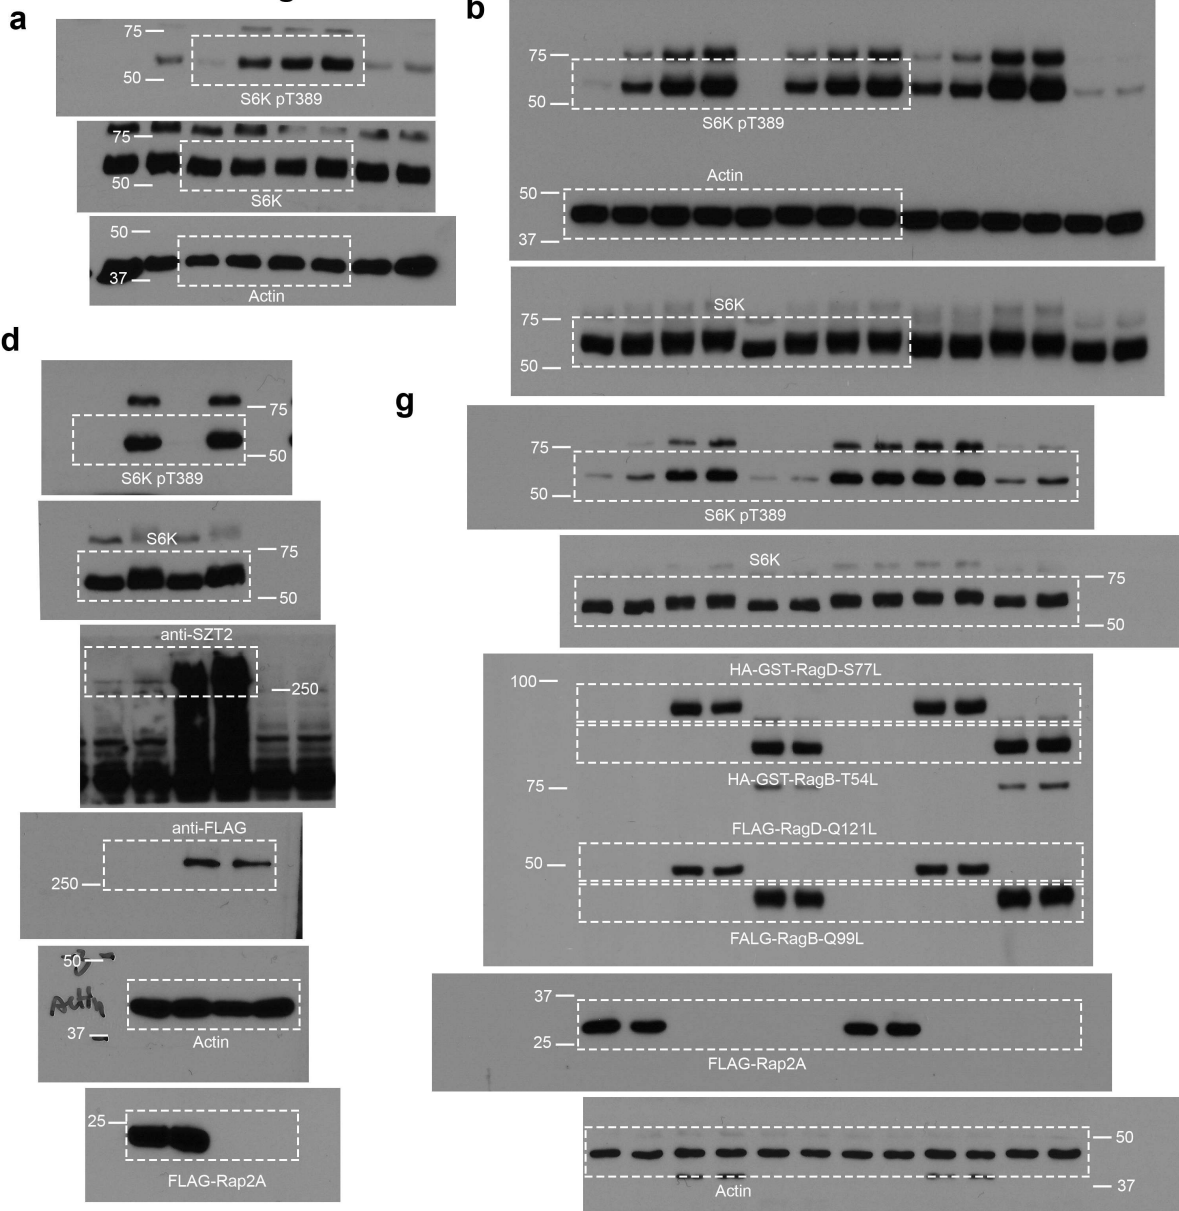

Blots were cut into slices before incubation with primary antibodies.

## Extended Data Figure 2

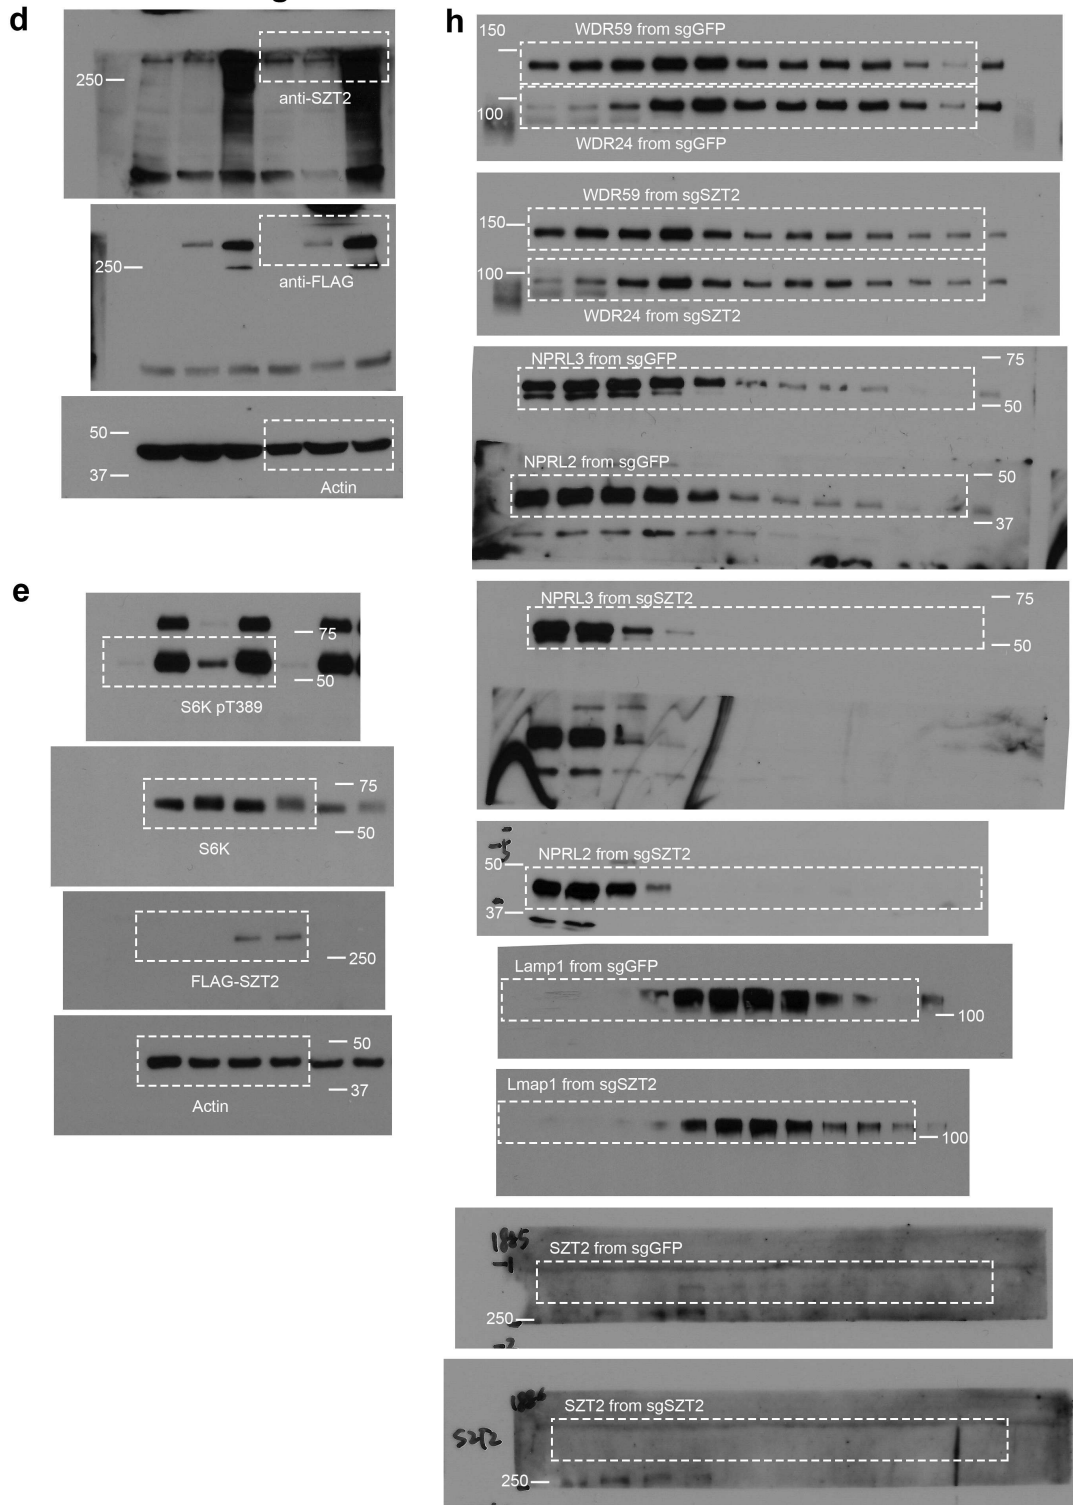

Blots were cut into slices before incubation with primary antibodies.

### Extended Data Figure 3

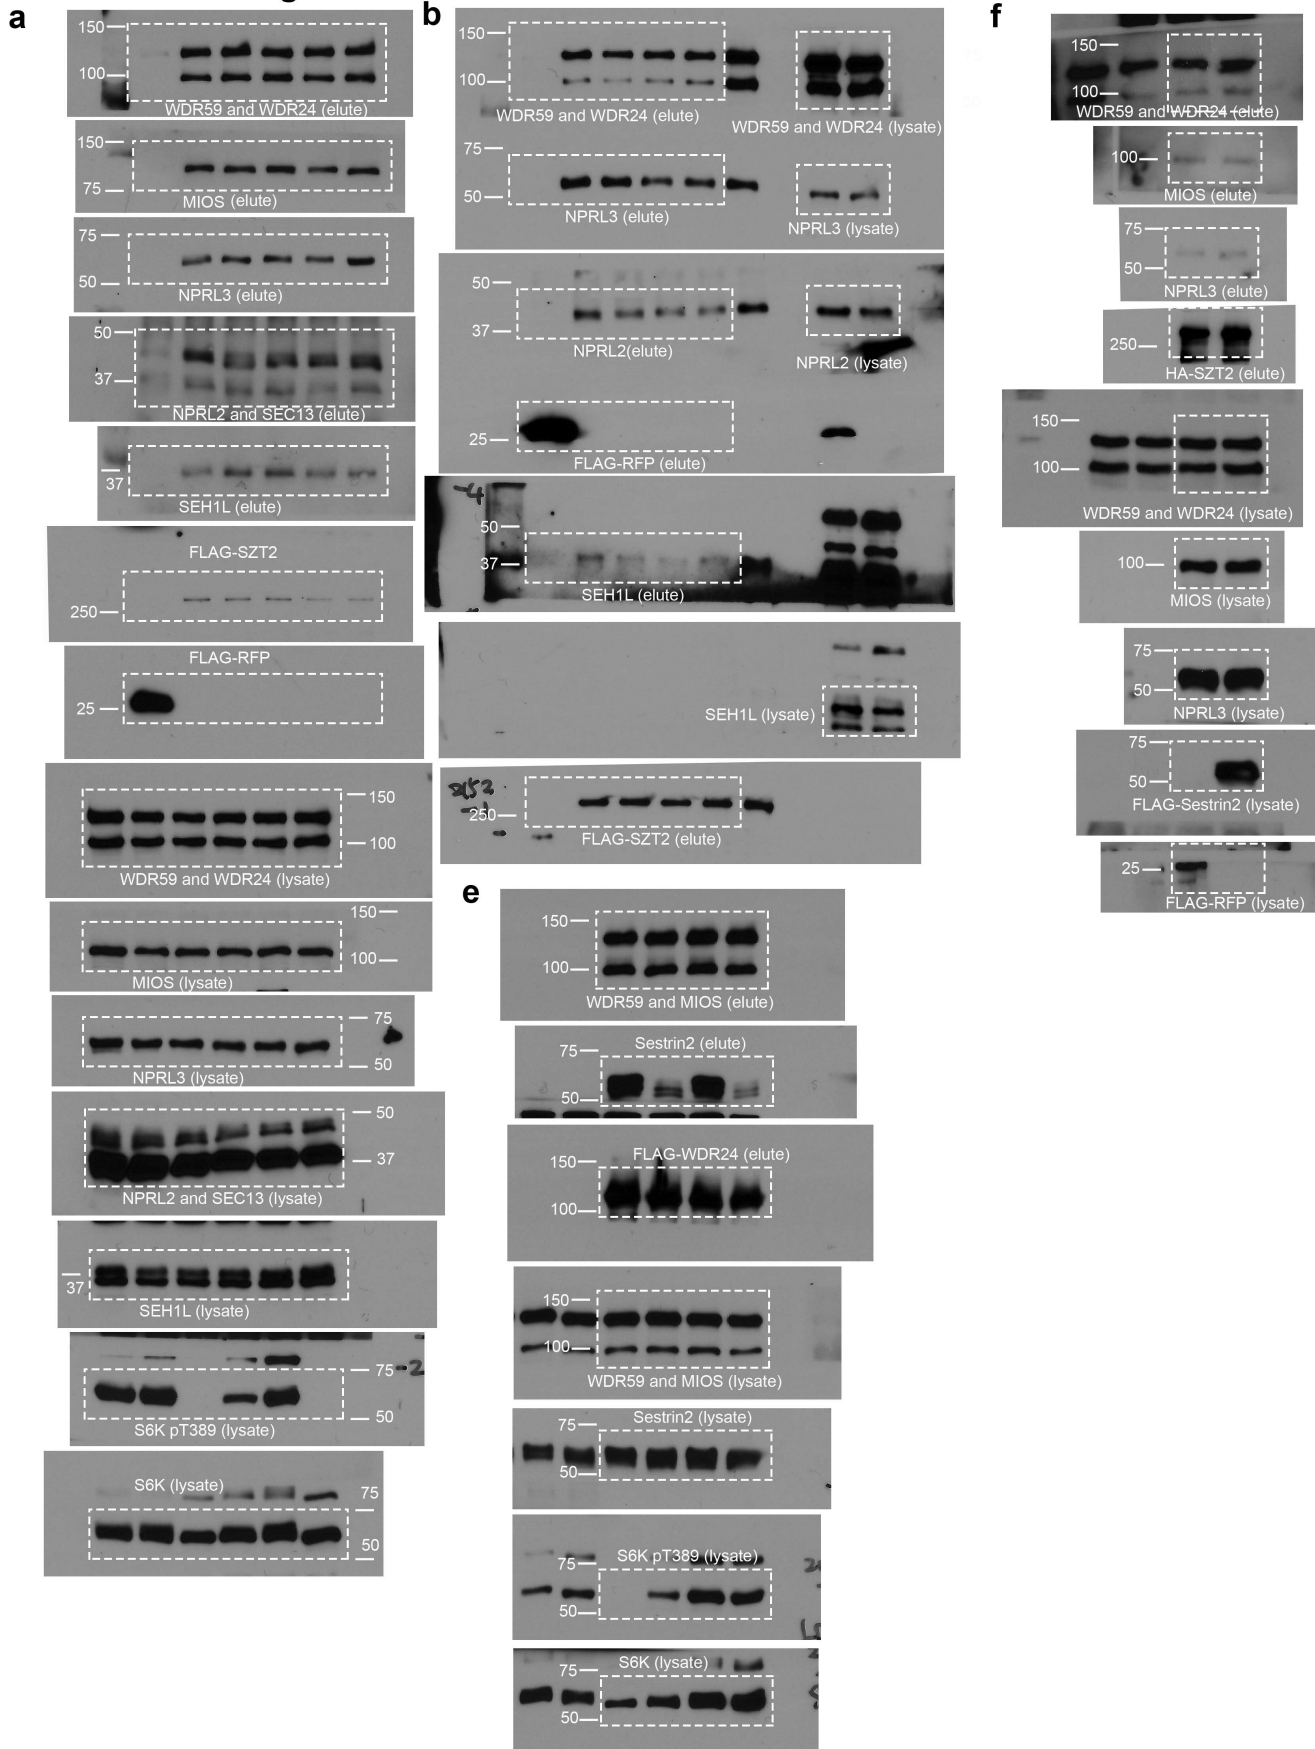

Blots were cut into slices before incubation with primary antibodies.



# Extended Data Figure 4

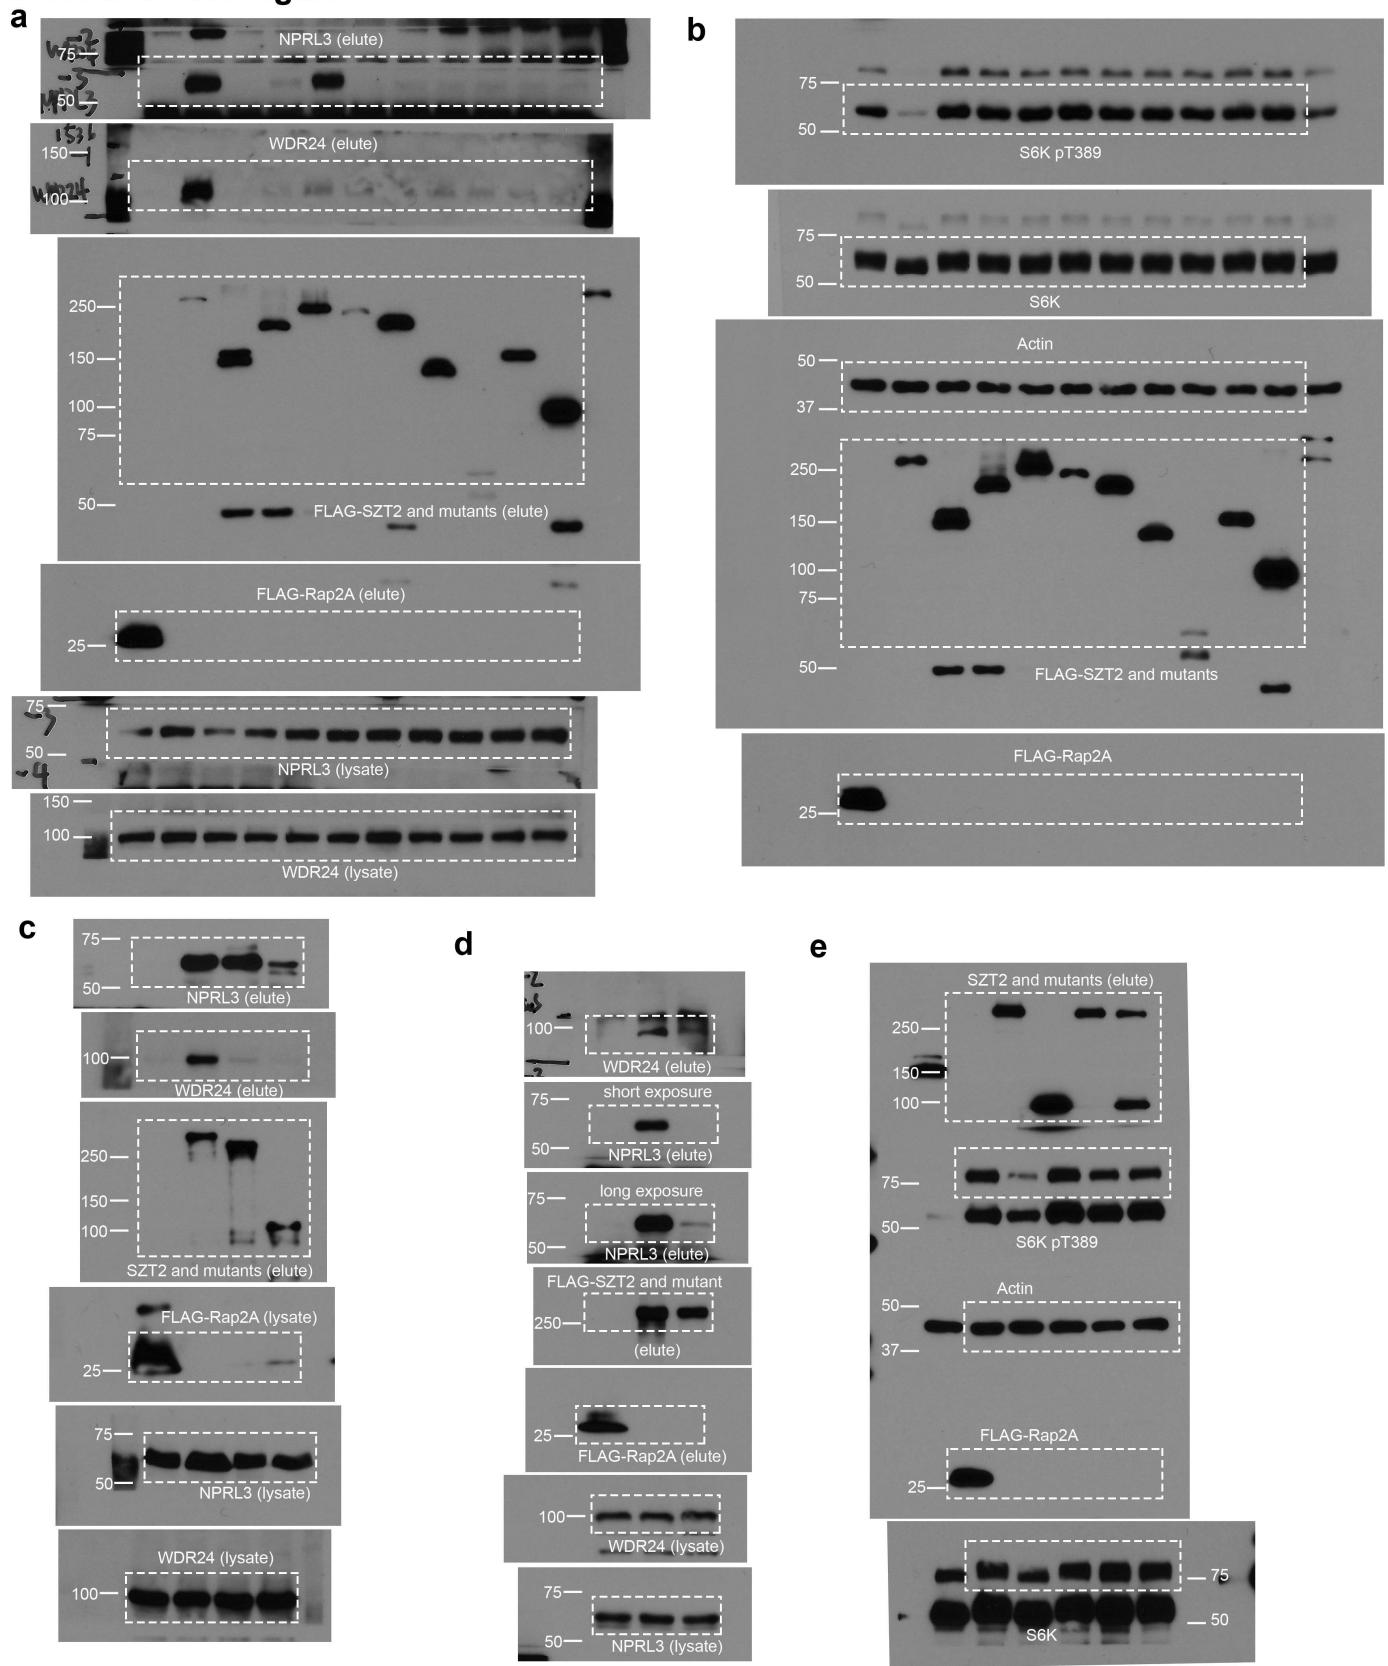

Blots were cut into slices before incubation with primary antibodies.

## Extended Data Figure 5

**h**

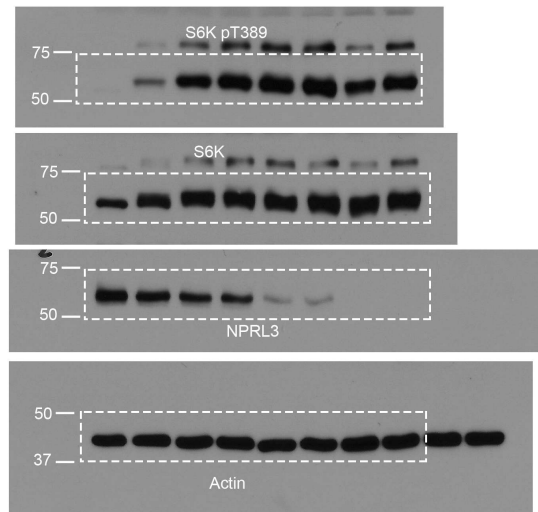

**Blots were cut into slices before incubation with primary antibodies.**

# Extended Data Figure 6

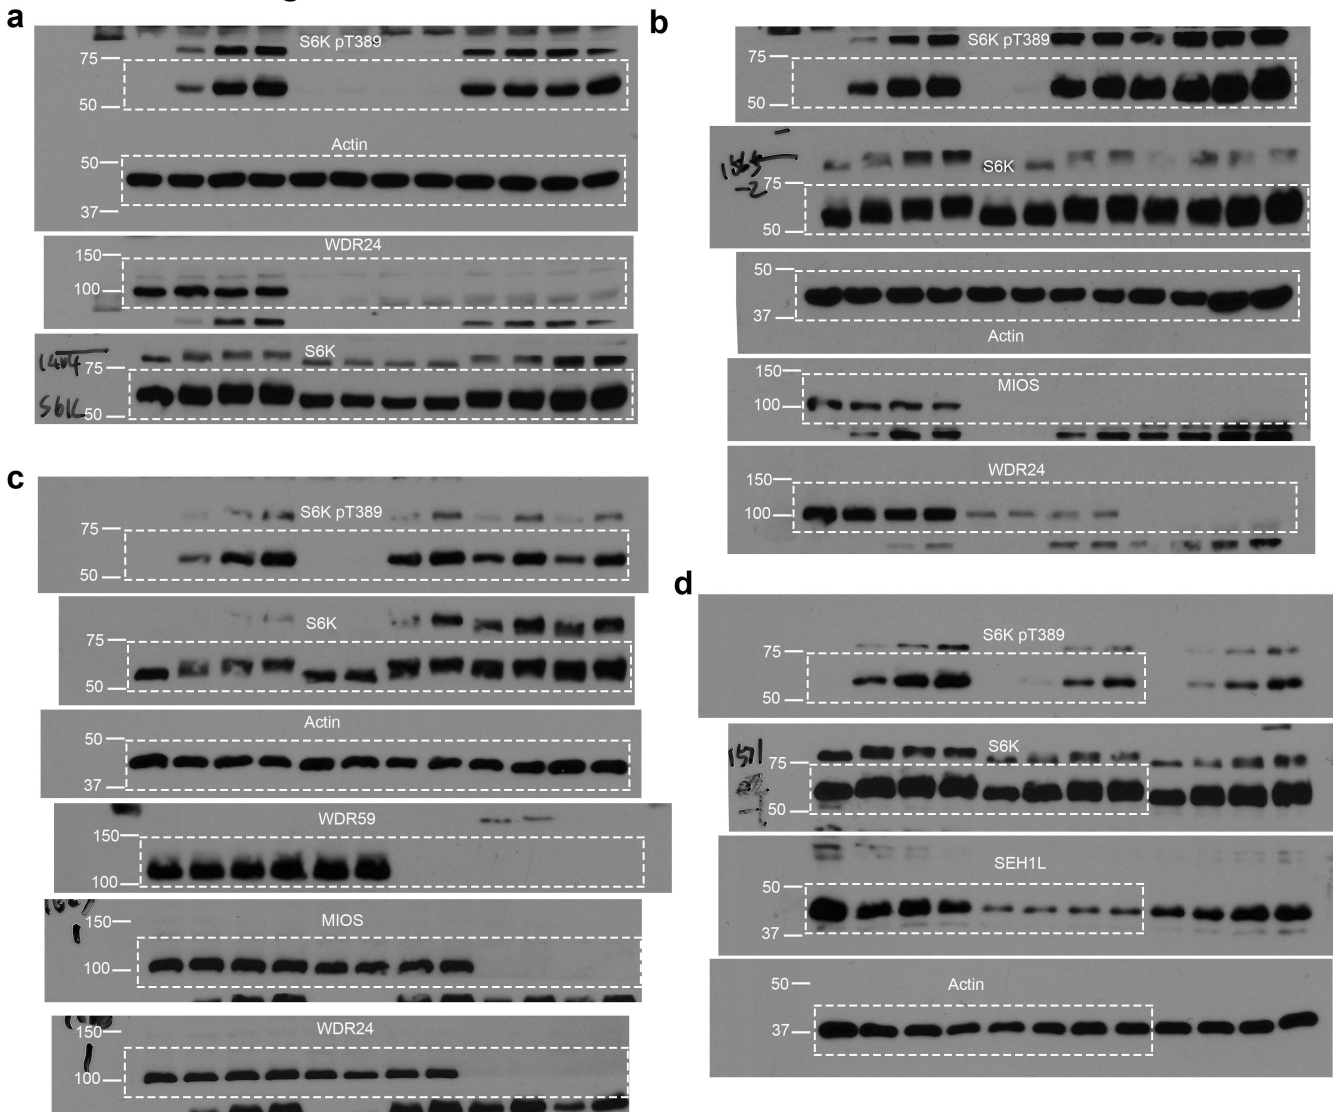

Blots were cut into slices before incubation with primary antibodies.

**Extended Data Figure 7, a - d**

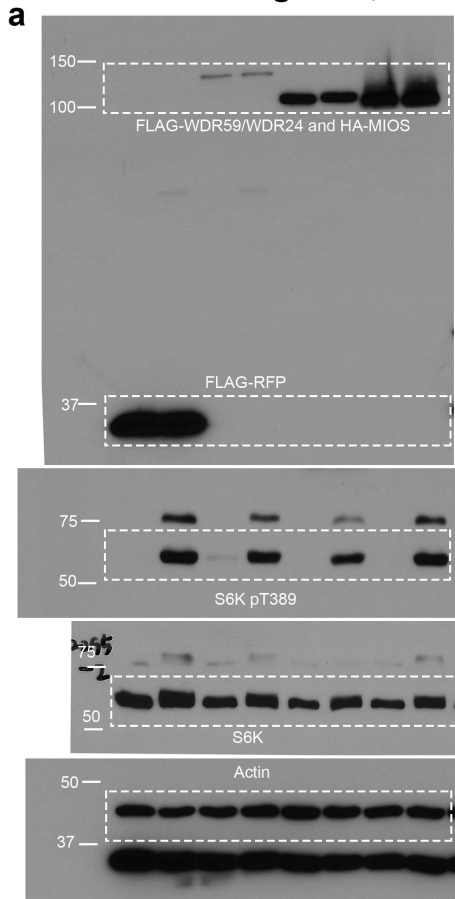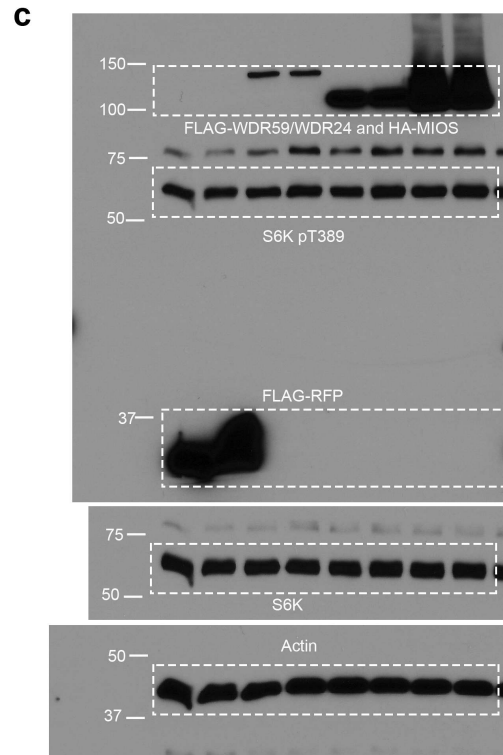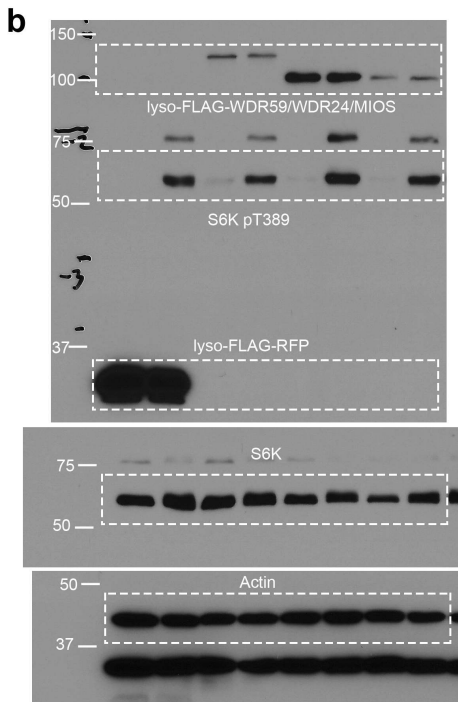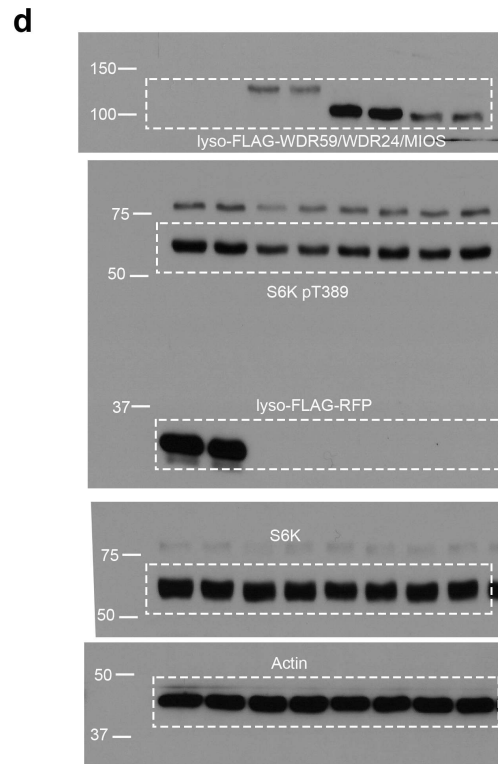

**Blots were cut into slices before incubation with primary antibodies.**



## Extended Data Figure 7, e, f, h

**e**

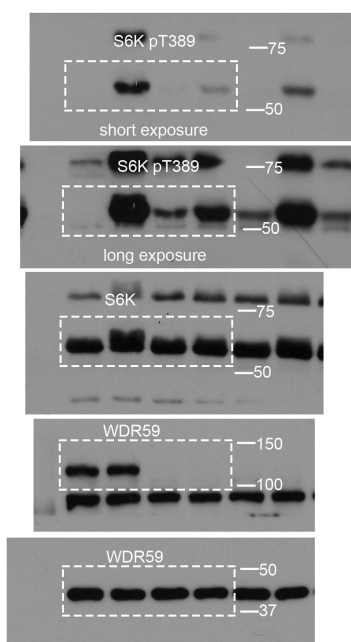

**f**

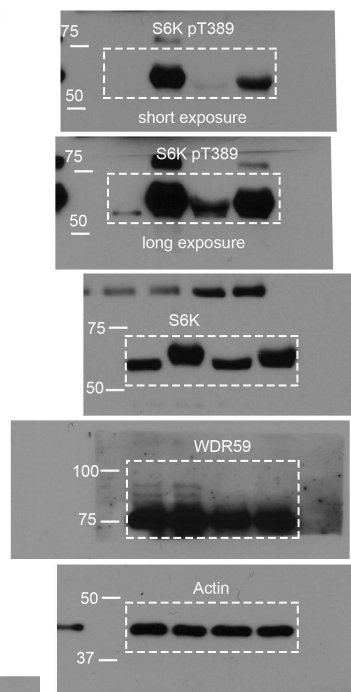

**h**

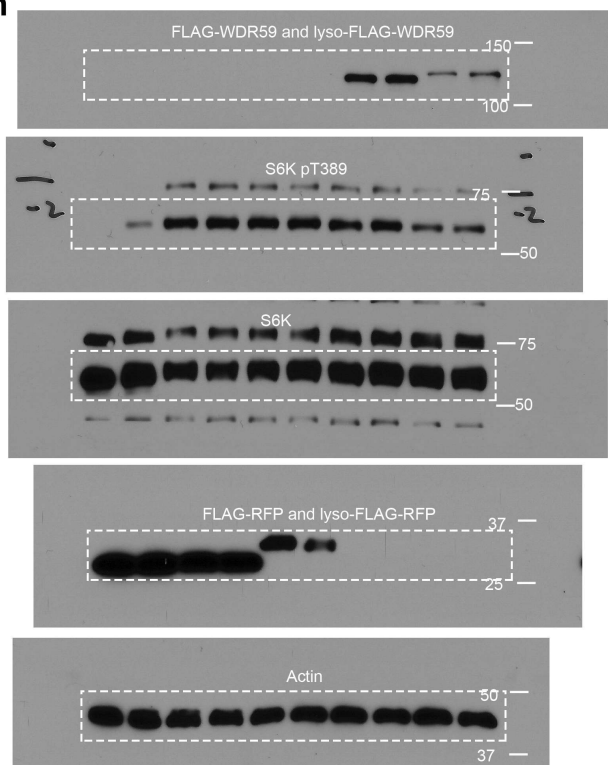

**Blots were cut into slices before incubation with primary antibodies.**

# Extended Data Figure 8, a - c

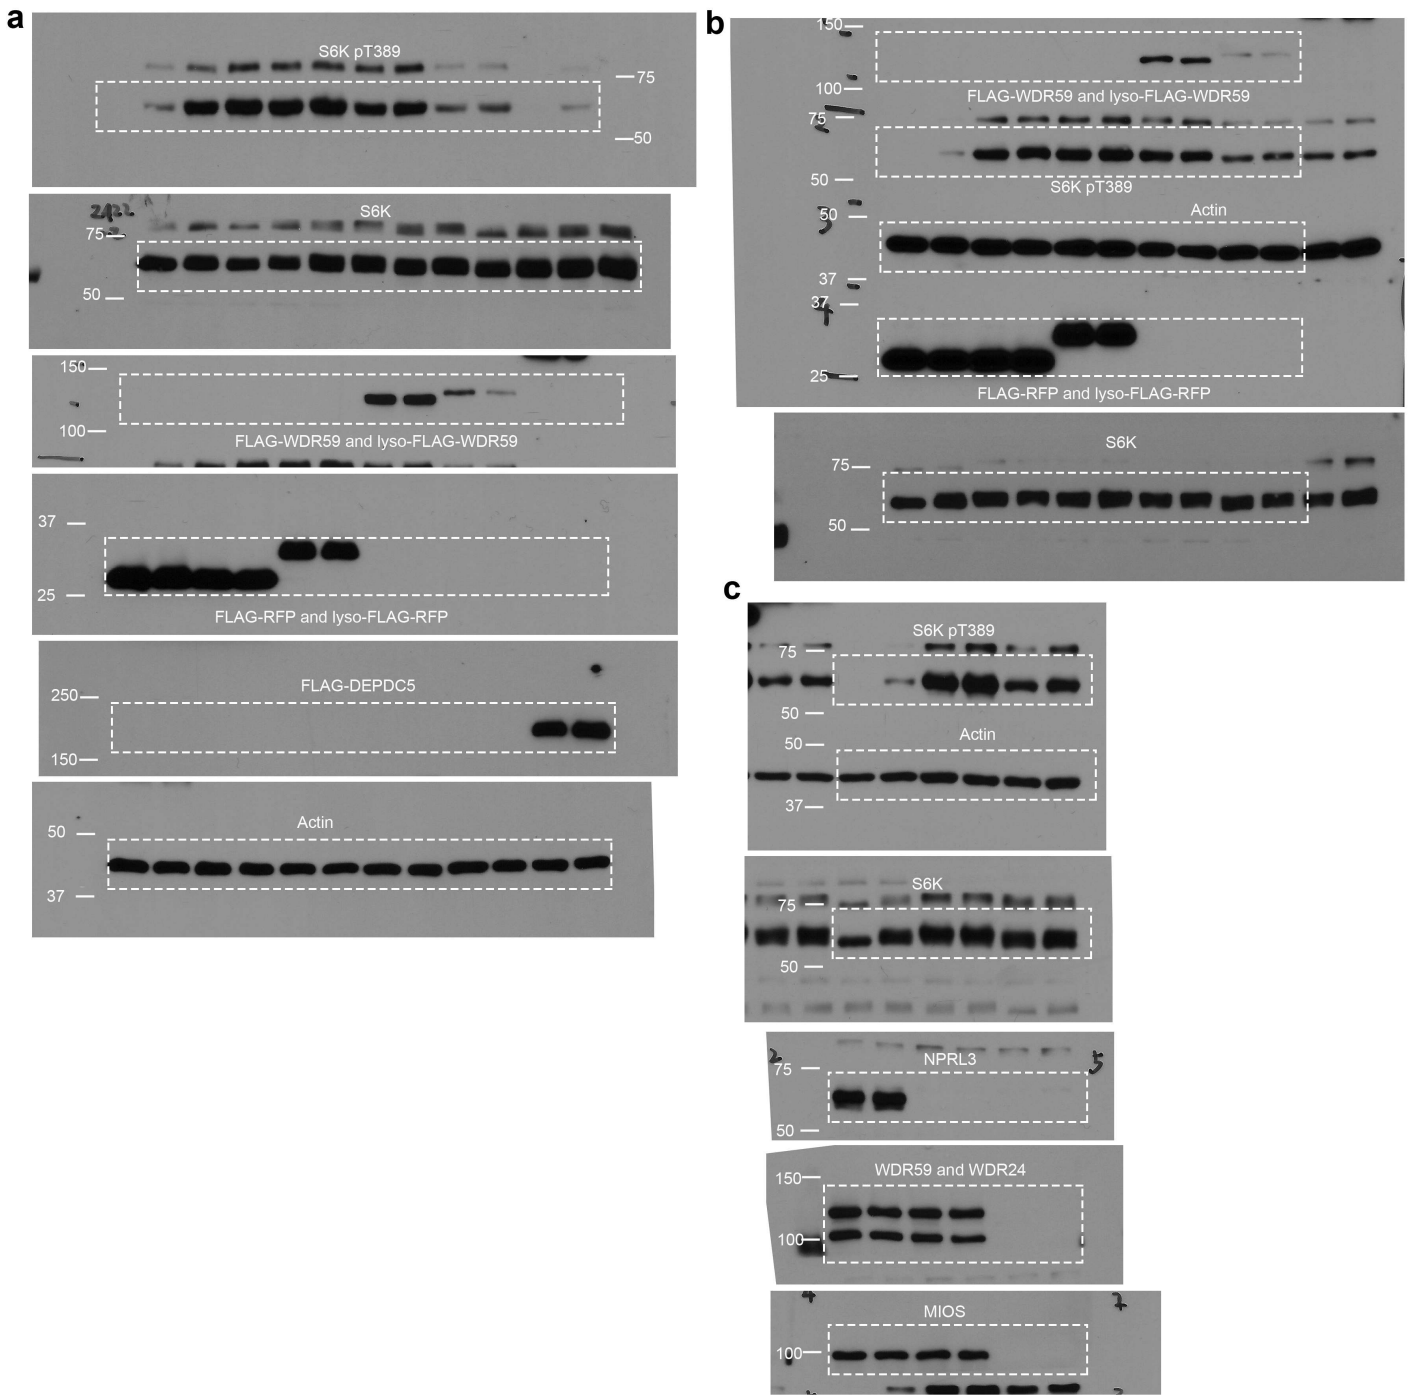

Blots were cut into slices before incubation with primary antibodies.

# Extended Data Figure 8, d, e

**d**

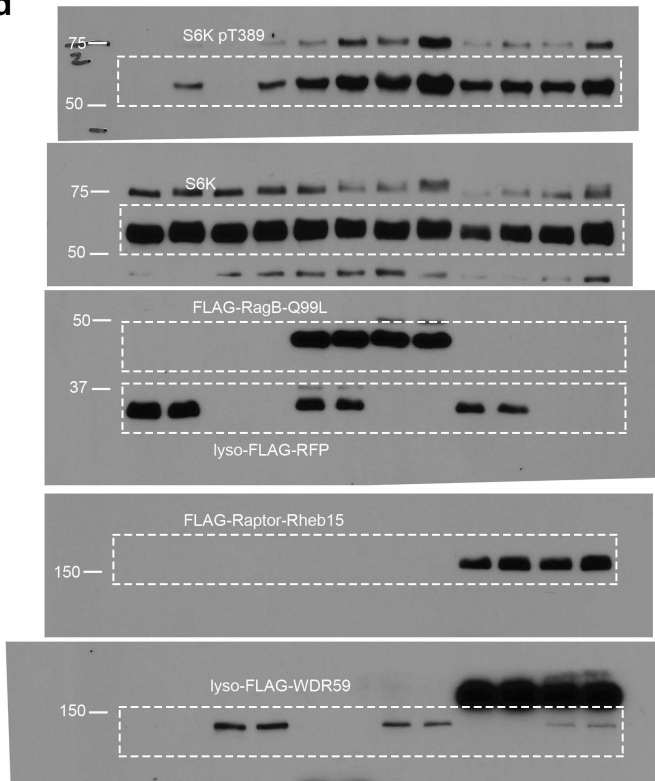

**e**

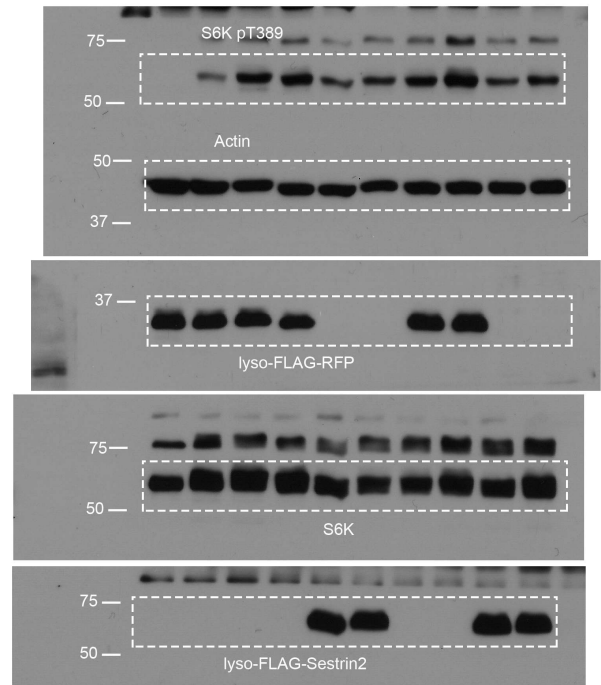

**Blots were cut into slices before incubation with primary antibodies.**

# Extended Data Figure 9

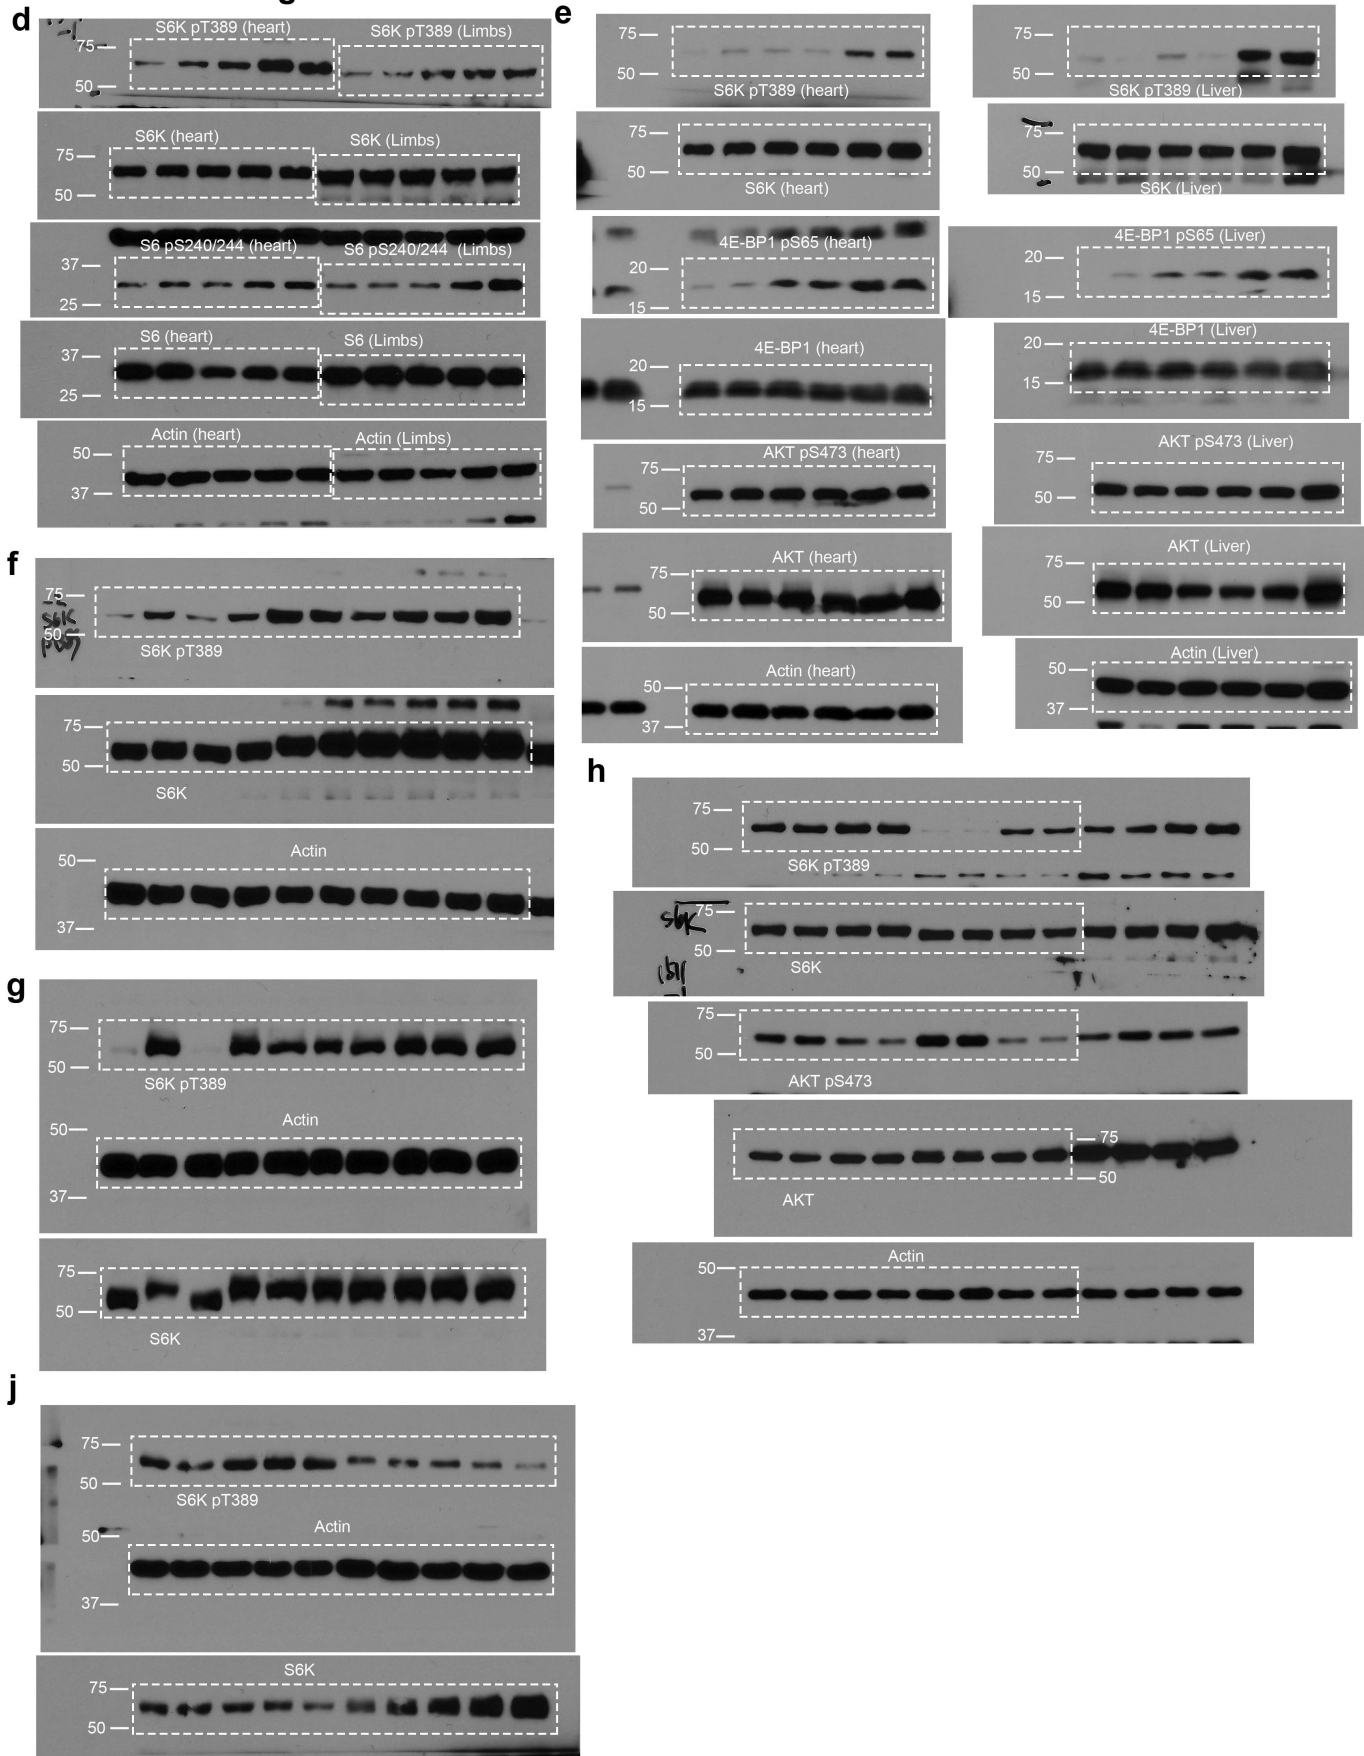

Blots were cut into slices before incubation with primary antibodies.
